# Supplementary material
Source: PubMed Central journal article supplement (PMC5110395)
Supplement: NIHMS818331-supplement-6.pdf [file NIHMS818331-supplement-6.pdf]

| LCM Islets_6IEQs overlap proteins |           | EIC Islets_50 IEQs overlap proteins |            | EIC Islets_1000 IEQs overla |           |
|-----------------------------------|-----------|-------------------------------------|------------|-----------------------------|-----------|
| Uniprot ID                        | Gene name | Uniprot ID                          | Gene names | Uniprot ID                  | Gene name |
| P00403                            | MT-CO2    | P01275                              | GCG        | P01275                      | GCG       |
| P00450                            | CP        | P01308                              | INS        | P01308                      | INS       |
| P00738                            | HP        | P63261                              | ACTG1      | P63261                      | ACTG1     |
| P01019                            | AGT       | P62807                              | HIST1H2BN  | P62807                      | HIST1H2BN |
| P01024                            | C3        | Q16777                              | HIST2H2AC  | Q16777                      | HIST2H2AC |
| P01834                            | IGKV3-11  | P04406                              | GAPDH      | P04406                      | GAPDH     |
| P01857                            | IGHG1     | P62805                              | HIST1H4A   | P62805                      | HIST1H4A  |
| P02452                            | COL1A1    | P40926                              | MDH2       | P40926                      | MDH2      |
| P02462                            | COL4A1    | P11021                              | HSPA5      | P11021                      | HSPA5     |
| P02533                            | KRT14     | P15085                              | CPA1       | P15085                      | CPA1      |
| P02538                            | KRT6A     | P07355                              | ANXA2      | P07355                      | ANXA2     |
| P02652                            | APOA2     | P06576                              | ATP5B      | P06576                      | ATP5B     |
| P02671                            | FGA       | P00352                              | ALDH1A1    | P00352                      | ALDH1A1   |
| P02675                            | FGB       | P06733                              | ENO1       | P06733                      | ENO1      |
| P02679                            | FGG       | P35579                              | MYH9       | P35579                      | MYH9      |
| P02763                            | ORM1      | P00558                              | PGK1       | P00558                      | PGK1      |
| P02768                            | ALB       | Q15084                              | PDIA6      | Q15084                      | PDIA6     |
| P02787                            | TF        | P14618                              | PKM        | P14618                      | PKM       |
| P02790                            | HPX       | P08670                              | VIM        | P08670                      | VIM       |
| P02794                            | FTH1      | P55060                              | CSE1L      | P55060                      | CSE1L     |
| P04114                            | APOB      | P62158                              | CALM2      | P62158                      | CALM2     |
| P04264                            | KRT1      | P07237                              | P4HB       | P07237                      | P4HB      |
| P05109                            | S100A8    | P10645                              | CHGA       | P10645                      | CHGA      |
| P05114                            | HMGN1     | P14625                              | HSP90B1    | P14625                      | HSP90B1   |
| P05204                            | HMGN3     | P05387                              | RPLP2      | P05387                      | RPLP2     |
| P05787                            | KRT8      | O43707                              | ACTN4      | O43707                      | ACTN4     |
| P07585                            | DCN       | P60174                              | TPI1       | P60174                      | TPI1      |
| P08123                            | COL1A2    | P08758                              | ANXA5      | P08758                      | ANXA5     |
| P08294                            | SOD3      | P62937                              | PPIA       | P62937                      | PPIA      |
| P08572                            | COL4A2    | P25705                              | ATP5A1     | P25705                      | ATP5A1    |
| P08779                            | KRT16     | P17538                              | CTRB2      | P17538                      | CTRB2     |
| P09493                            | TPM1      | P09972                              | ALDOC      | P09972                      | ALDOC     |
| P09497                            | CLTB      | P08238                              | HSP90AB1   | P08238                      | HSP90AB1  |
| P09651                            | HNRNPA1   | P12111                              | COL6A3     | P12111                      | COL6A3    |
| P09669                            | COX6C     | Q00610                              | CLTC       | Q00610                      | CLTC      |
| POC0L5                            | C4B       | O00299                              | CLIC1      | O00299                      | CLIC1     |
| POCG06                            | IGLC3     | P30101                              | PDIA3      | P30101                      | PDIA3     |
| POCW22                            | RPS17     | P10909                              | CLU        | P10909                      | CLU       |
| P13645                            | KRT10     | P22314                              | UBA1       | P22314                      | UBA1      |
| P13647                            | KRT5      | P16870                              | CPE        | P16870                      | CPE       |
| P20340                            | RAB6B     | P05451                              | REG1A      | P05451                      | REG1A     |
| P20671                            | HIST1H2AJ | O75369                              | FLNB       | O75369                      | FLNB      |
| P22061                            | PCMT1     | P08133                              | ANXA6      | P08133                      | ANXA6     |
| P33176                            | KIF5A     | P15086                              | CPB1       | P15086                      | CPB1      |
| P35268                            | RPL22     | P11142                              | HSPA8      | P11142                      | HSPA8     |
| P35527                            | KRT9      | P68371                              | TUBB4B     | P68371                      | TUBB4B    |
| P39060                            | COL18A1   | P05783                              | KRT18      | P05783                      | KRT18     |
| P46779                            | RPL28     | P09525                              | ANXA4      | P09525                      | ANXA4     |

|        |          |        |          |        |          |
|--------|----------|--------|----------|--------|----------|
| P49207 | RPL34    | P05388 | RPLP0    | P05388 | RPLP0    |
| P50895 | BCAM     | P30086 | PEBP1    | P30086 | PEBP1    |
| P51884 | LUM      | P10809 | HSPD1    | P10809 | HSPD1    |
| P51888 | PRELP    | Q14204 | DYNC1H1  | Q14204 | DYNC1H1  |
| P60660 | MYL6     | P55072 | VCP      | P55072 | VCP      |
| P62316 | SNRPD2   | P21333 | FLNA     | P21333 | FLNA     |
| P62491 | RAB11A   | P07437 | TUBB     | P07437 | TUBB     |
| P62820 | RAB1A    | P00505 | GOT2     | P00505 | GOT2     |
| P62899 | RPL31    | P29401 | TKT      | P29401 | TKT      |
| P62979 | UBB      | Q9H0U4 | RAB1B    | Q9H0U4 | RAB1B    |
| P69905 | HBA1     | P04792 | HSPB1    | P04792 | HSPB1    |
| P80404 | DCD      | P46940 | IQGAP1   | P46940 | IQGAP1   |
| P82979 | RPL24    | Q15365 | PCBP1    | Q15365 | PCBP1    |
| P83731 | RPL36A   | Q13228 | SELENBP1 | Q13228 | SELENBP1 |
| P84098 | SRSF3    | Q96AG4 | LRRCS9   | Q96AG4 | LRRCS9   |
| P98160 | HSPG2    | P05060 | CHGB     | P05060 | CHGB     |
| Q00765 | REEP5    | P21796 | VDAC1    | P21796 | VDAC1    |
| Q01995 | TAGLN    | P09211 | GSTP1    | P09211 | GSTP1    |
| Q02252 | ALDH6A1  | P13667 | PDIA4    | P13667 | PDIA4    |
| Q03135 | CAV1     | P02545 | LMNA     | P02545 | LMNA     |
| Q05707 | COL14A1  | P23284 | PPIB     | P23284 | PPIB     |
| Q12907 | LMAN2    | P00441 | SOD1     | P00441 | SOD1     |
| Q14624 | ITIH4    | P30044 | PRDX5    | P30044 | PRDX5    |
| Q16181 | Septin-7 | O76038 | SCGN     | O76038 | SCGN     |
| Q5T749 | KPRP     | Q15149 | PLEC     | Q15149 | PLEC     |
| Q5T8M8 | ACTA1    | P13639 | EEF2     | P13639 | EEF2     |
| Q6PCB0 | VWA1     | P48735 | IDH2     | P48735 | IDH2     |
| Q86YZ3 | HRNR     | P68032 | ACTC1    | P68032 | ACTC1    |
| Q8NFU3 | TSTD1    | P36578 | RPL4     | P36578 | RPL4     |
| Q9BVC6 | TMEM109  | Q13813 | SPTAN1   | Q13813 | SPTAN1   |
| Q9UI15 | TAGLN3   | P62258 | YWHAE    | P62258 | YWHAE    |
| D6RF35 | GC       | P49748 | ACADVL   | P49748 | ACADVL   |
| O00299 | CLIC1    | P06396 | GSN      | P06396 | GSN      |
| O14773 | TPP1     | P11766 | ADH5     | P11766 | ADH5     |
| O14818 | PSMA7    | Q9Y490 | TLN1     | Q9Y490 | TLN1     |
| O14979 | HNRNPDL  | Q86VP6 | CAND1    | Q86VP6 | CAND1    |
| O14980 | XPO1     | P08107 | HSPA1A   | P08107 | HSPA1A   |
| O15144 | ARPC2    | P40925 | MDH1     | P40925 | MDH1     |
| O15173 | PGRMC2   | P12277 | CKB      | P12277 | CKB      |
| O43390 | HNRNPR   | P00367 | GLUD1    | P00367 | GLUD1    |
| O43707 | ACTN4    | P12956 | XRCC6    | P12956 | XRCC6    |
| O43795 | MYO1B    | P78527 | PRKDC    | P78527 | PRKDC    |
| O60506 | SYNCRIP  | P68104 | EEF1A1   | P68104 | EEF1A1   |
| O60763 | USO1     | P27797 | CALR     | P27797 | CALR     |
| O60825 | PFKFB2   | P02766 | TTR      | P02766 | TTR      |
| O75083 | WDR1     | P30050 | RPL12    | P30050 | RPL12    |
| O75131 | CPNE3    | P06753 | TPM3     | P06753 | TPM3     |
| O75347 | TBCA     | P28331 | NDUFS1   | P28331 | NDUFS1   |
| O75348 | ATP6V1G1 | Q96I99 | SUCLG2   | Q96I99 | SUCLG2   |
| O75367 | H2AFY    | P61978 | HNRNPK   | P61978 | HNRNPK   |

|        |          |        |          |        |          |
|--------|----------|--------|----------|--------|----------|
| O75368 | SH3BGRL  | P18669 | PGAM1    | P18669 | PGAM1    |
| O75369 | FLNB     | P15311 | EZR      | P15311 | EZR      |
| O75390 | CS       | P12109 | COL6A1   | P12109 | COL6A1   |
| O75396 | SEC22B   | P38646 | HSPA9    | P38646 | HSPA9    |
| O75874 | IDH1     | P63104 | YWHAZ    | P63104 | YWHAZ    |
| O75947 | ATP5H    | P55327 | TPD52    | P55327 | TPD52    |
| O76038 | SCGN     | Q96KP4 | CNDP2    | Q96KP4 | CNDP2    |
| O94760 | DDAH1    | P04075 | ALDOA    | P04075 | ALDOA    |
| O94925 | GLS      | P35580 | MYH10    | P62913 | RPL11    |
| O94979 | SEC31A   | P50440 | GATM     | P35580 | MYH10    |
| O95336 | PGLS     | Q09666 | AHNAK    | P50440 | GATM     |
| O95340 | PAPSS2   | P04843 | RPN1     | Q09666 | AHNAK    |
| O95716 | RAB3D    | P13489 | RNH1     | P04843 | RPN1     |
| P00325 | ADH1B    | Q9Y4L1 | HYOU1    | P13489 | RNH1     |
| P00338 | LDHA     | O15240 | VGf      | Q9Y4L1 | HYOU1    |
| P00352 | ALDH1A1  | P14550 | AKR1A1   | O15240 | VGf      |
| P00367 | GLUD1    | P52272 | HNRNPM   | P14550 | AKR1A1   |
| P00387 | CYB5R3   | P52565 | ARHGDIa  | P52272 | HNRNPM   |
| P00441 | SOD1     | Q07020 | RPL18    | P52565 | ARHGDIa  |
| P00505 | GOT2     | P50395 | GDI2     | Q07020 | RPL18    |
| P00558 | PGK1     | Q08380 | LGALS3BP | P50395 | GDI2     |
| P00918 | CA2      | P62241 | RPS8     | Q08380 | LGALS3BP |
| P00995 | SPINK1   | P27348 | YWHAQ    | P62241 | RPS8     |
| P01009 | SERPINA1 | P23528 | CFL1     | P27348 | YWHAQ    |
| P01011 | SERPINA3 | P63244 | GNB2L1   | P23528 | CFL1     |
| P01023 | A2M      | P53621 | COPA     | P63244 | GNB2L1   |
| P01033 | TIMP1    | P30740 | SERPINB1 | P53621 | COPA     |
| P01275 | GCG      | P19835 | CEL      | P30740 | SERPINB1 |
| P01308 | INS      | Q13087 | PDIA2    | P19835 | CEL      |
| P02545 | LMNA     | P53396 | ACLY     | Q13087 | PDIA2    |
| P02647 | APOA1    | P30048 | PRDX3    | H7BZJ3 | PDIA3    |
| P02766 | TTR      | P23396 | RPS3     | P53396 | ACLY     |
| P04054 | PLA2G1B  | P45880 | VDAC2    | P30048 | PRDX3    |
| P04075 | ALDOA    | Q99497 | PARK7    | P10599 | TXN      |
| P04118 | CLPS     | P08865 | RPSA     | P23396 | RPS3     |
| P04179 | SOD2     | Q01082 | SPTBN1   | P45880 | VDAC2    |
| P04406 | GAPDH    | P68871 | HBB      | Q99497 | PARK7    |
| P04746 | AMY2A    | P62829 | RPL23    | P08865 | RPSA     |
| P04792 | HSPB1    | P47755 | CAPZA2   | Q01082 | SPTBN1   |
| P04843 | RPN1     | P26599 | PTBP1    | P68871 | HBB      |
| P04844 | RPN2     | P62888 | RPL30    | P62979 | RPS27A   |
| P05023 | ATP1A1   | Q06830 | PRDX1    | P62829 | RPL23    |
| P05026 | ATP1B1   | Q13162 | PRDX4    | P47755 | CAPZA2   |
| P05060 | CHGB     | Q9UHG2 | PCSK1N   | P26599 | PTBP1    |
| P05141 | SLC25A5  | Q99714 | HSD17B10 | P62888 | RPL30    |
| P05198 | EIF2S1   | P07910 | HNRNPC   | Q06830 | PRDX1    |
| P05387 | RPLP2    | P04179 | SOD2     | Q13162 | PRDX4    |
| P05388 | RPLP0    | P48052 | CPA2     | Q9UHG2 | PCSK1N   |
| P05408 | SCG5     | P12814 | ACTN1    | Q99714 | HSD17B10 |
| P05451 | REG1A    | Q16555 | DPYSL2   | P07910 | HNRNPC   |

|        |          |        |           |        |            |
|--------|----------|--------|-----------|--------|------------|
| P05783 | KRT18    | P05141 | SLC25A5   | P04179 | SOD2       |
| P06396 | GSN      | Q7Z406 | MYH14     | P48052 | CPA2       |
| P06454 | PTMA     | P12236 | SLC25A6   | P12814 | ACTN1      |
| P06576 | ATP5B    | P49368 | CCT3      | P14406 | COX7A2     |
| P06733 | ENO1     | Q9H8H3 | METTL7A   | P07478 | PRSS2      |
| P06744 | GPI      | O75367 | H2AFY     | Q9UI12 | ATP6V1H    |
| P06748 | NPM1     | Q9P2E9 | RRBP1     | Q16555 | DPYSL2     |
| P06753 | TPM3     | P05023 | ATP1A1    | P05141 | SLC25A5    |
| P07099 | EPHX1    | P61604 | HSPE1     | Q7Z406 | MYH14      |
| P07108 | DBI      | Q8WVM8 | SCFD1     | P12236 | SLC25A6    |
| P07195 | LDHB     | Q99798 | ACO2      | P49368 | CCT3       |
| P07237 | P4HB     | P35606 | COPB2     | Q9H8H3 | METTL7A    |
| P07305 | H1FO     | P00387 | CYB5R3    | O75367 | H2AFY      |
| P07339 | CTSD     | P07099 | EPHX1     | Q9P2E9 | RRBP1      |
| P07355 | ANXA2    | P13521 | SCG2      | P05023 | ATP1A1     |
| P07384 | CAPN1    | P19338 | NCL       | P61604 | HSPE1      |
| P07478 | PRSS2    | P60660 | PDE6H     | Q8WVM8 | SCFD1      |
| P07602 | PSAP     | Q08211 | DHX9      | O95154 | AKR7A3     |
| P07737 | PFN1     | Q13561 | DCTN2     | Q99798 | ACO2       |
| P07741 | APRT     | P08195 | SLC3A2    | P16233 | PNLIP      |
| P07900 | HSP90AA1 | P30041 | PRDX6     | P35606 | COPB2      |
| P07910 | HNRNPC   | P26641 | EEF1G     | P00387 | CYB5R3     |
| P07942 | LAMB1    | O60506 | SYNCRIP   | P07099 | EPHX1      |
| P08107 | HSPA1A   | P62879 | GNB2      | P13521 | SCG2       |
| P08133 | ANXA6    | Q93084 | ATP2A3    | P19338 | NCL        |
| P08195 | SLC3A2   | P12830 | CDH1      | Q5TEC6 | HIST2H3PS: |
| P08238 | HSP90AB1 | Q16836 | HADH      | P60660 | PDE6H      |
| P08670 | VIM      | P43304 | GPD2      | Q08211 | DHX9       |
| P08758 | ANXA5    | P00390 | GSR       | Q13561 | DCTN2      |
| P08861 | CELA3B   | P04844 | RPN2      | P08195 | SLC3A2     |
| P08865 | RPSA     | P40939 | HADHA     | P30041 | PRDX6      |
| P09093 | CELA3A   | Q7KZF4 | SND1      | P26641 | EEF1G      |
| P09104 | ENO2     | O43390 | HNRNPR    | O60506 | SYNCRIP    |
| P09210 | GSTA2    | P49189 | ALDH9A1   | P62879 | GNB2       |
| P09211 | GSTP1    | P10412 | HIST1H1E  | Q93084 | ATP2A3     |
| P09382 | LGALS1   | Q10567 | AP1B1     | P12830 | CDH1       |
| P09417 | QDPR     | P24752 | ACAT1     | Q16836 | HADH       |
| P09429 | HMGB1    | Q9Y678 | COPG1     | P43304 | GPD2       |
| P09471 | GNAO1    | P22626 | HNRNPA2B1 | P00390 | GSR        |
| P09496 | CLTA     | O00567 | NOP56     | P04844 | RPN2       |
| P09525 | ANXA4    | P05408 | SCG5      | P40939 | HADHA      |
| P09622 | DLD      | P49411 | TUFM      | O75489 | NDUFS3     |
| P09874 | PARP1    | P09936 | UCHL1     | Q7KZF4 | SND1       |
| P09936 | UCHL1    | P50990 | CCT8      | O43390 | HNRNPR     |
| P09960 | LTA4H    | P55786 | NPEPPS    | Q9Y333 | LSM2       |
| P0C0S5 | H2AFV    | Q15185 | PTGES3    | P49189 | ALDH9A1    |
| P10253 | GAA      | P46781 | RPS9      | P10412 | HIST1H1E   |
| P10599 | TXN      | Q16891 | IMMT      | Q9P0L0 | VAPA       |
| P10606 | COX5B    | P12532 | CKMT1A    | Q10567 | AP1B1      |
| P10645 | CHGA     | Q99623 | PHB2      | P24752 | ACAT1      |

|        |          |        |          |        |          |
|--------|----------|--------|----------|--------|----------|
| P10768 | ESD      | P62424 | RPL7A    | P02647 | APOA1    |
| P10809 | HSPD1    | P78371 | CCT2     | O43488 | AKR7A2   |
| P10909 | CLU      | Q9BS26 | ERP44    | Q9Y678 | COPG1    |
| P11021 | HSPA5    | P09960 | LTA4H    | P22626 | HNRNPA2B |
| P11047 | LAMC1    | P26640 | VARS     | O00567 | NOP56    |
| P11137 | MAP2     | P06744 | GPI      | P05408 | SCG5     |
| P11142 | HSPA8    | Q00839 | HNRNPU   | P49411 | TUFM     |
| P11279 | LAMP1    | P31930 | UQCRC1   | P53007 | SLC25A1  |
| P11310 | ACADM    | Q16822 | PCK2     | Q9NR45 | NANS     |
| P11940 | PABPC1   | P61019 | RAB2A    | P09936 | UCHL1    |
| P12109 | COL6A1   | P07339 | CTSD     | P50990 | CCT8     |
| P12110 | COL6A2   | P48304 | REG1B    | P55786 | NPEPPS   |
| P12111 | COL6A3   | P53618 | COPB1    | Q15185 | PTGES3   |
| P12236 | SLC25A6  | P07900 | HSP90AA1 | P46781 | RPS9     |
| P12277 | CKB      | P13010 | XRCC5    | Q16891 | IMMT     |
| P12532 | CKMT1A   | Q04917 | YWHAH    | P12532 | CKMT1A   |
| P12814 | ACTN1    | P62873 | GNB1     | Q99623 | PHB2     |
| P12956 | XRCC6    | P15924 | DSP      | P62424 | RPL7A    |
| P13010 | XRCC5    | P16152 | CBR1     | P78371 | CCT2     |
| P13073 | COX4I1   | P09382 | LGALS1   | Q9BS26 | ERP44    |
| P13489 | RNH1     | P27816 | MAP4     | P35237 | SERPINB6 |
| P13521 | SCG2     | P42704 | LRPPRC   | P09960 | LTA4H    |
| P13639 | EEF2     | Q99536 | VAT1     | P26640 | VARS     |
| P13667 | PDIA4    | P31939 | ATIC     | P06744 | GPI      |
| P14314 | PRKCSH   | P80404 | ABAT     | Q00839 | HNRNPU   |
| P14543 | NID1     | Q07065 | CKAP4    | P00995 | SPINK1   |
| P14550 | AKR1A1   | P34932 | HSPA4    | P61960 | UFM1     |
| P14618 | PKM      | P45974 | USP5     | P31930 | UQCRC1   |
| P14625 | HSP90B1  | P43243 | MATR3    | Q16822 | PCK2     |
| P14866 | HNRNPL   | P37837 | TALDO1   | P61019 | RAB2A    |
| P14868 | DARS     | P63241 | EIF5A    | P07339 | CTSD     |
| P14923 | JUP      | P07602 | PSAP     | P48304 | REG1B    |
| P15085 | CPA1     | P46821 | MAP1B    | P53618 | COPB1    |
| P15086 | CPB1     | Q13838 | DDX39B   | P07900 | HSP90AA1 |
| P15121 | AKR1B1   | Q01518 | CAP1     | P13010 | XRCC5    |
| P15311 | EZR      | P35232 | PHB      | Q04917 | YWHAH    |
| P15880 | RPS2     | P50502 | ST13     | P62873 | GNB1     |
| P15924 | DSP      | Q8WXD2 | SCG3     | P15924 | DSP      |
| P16233 | PNLIP    | P09874 | PARP1    | P16152 | CBR1     |
| P16403 | HIST1H1C | Q9ULU8 | CADPS    | P09382 | LGALS1   |
| P16519 | PCSK2    | P24534 | EEF1B2   | P27816 | MAP4     |
| P16615 | ATP2A2   | P30040 | ERP29    | P42704 | LRPPRC   |
| P16870 | CPE      | P26038 | MSN      | Q99536 | VAT1     |
| P17174 | GOT1     | P00325 | ADH1B    | P31939 | ATIC     |
| P17844 | DDX5     | P01011 | SERPINA3 | P80404 | ABAT     |
| P17987 | TCP1     | P02774 | GC       | Q07065 | CKAP4    |
| P18124 | RPL7     | P39656 | DDOST    | P34932 | HSPA4    |
| P18206 | VCL      | P21281 | ATP6V1B2 | P45974 | USP5     |
| P18621 | RPL17    | Q99460 | PSMD1    | Q9UBQ7 | GRHPR    |
| P18669 | PGAM1    | P20073 | ANXA7    | P43243 | MATR3    |

|        |           |         |         |        |          |
|--------|-----------|---------|---------|--------|----------|
| P18859 | ATP5J     | O60701  | UGDH    | P37837 | TALDO1   |
| P19021 | PAM       | P62851  | RPS25   | Q13011 | ECH1     |
| P19105 | MYL12A    | P62249  | RPS16   | P63241 | EIF5A    |
| P19338 | NCL       | P27824  | CANX    | P07602 | PSAP     |
| P19835 | CEL       | P13804  | ETFA    | P46821 | MAP1B    |
| P20073 | ANXA7     | Q16851  | UGP2    | Q13838 | DDX39B   |
| P20231 | TPSAB1    | P00338  | LDHA    | Q01518 | CAP1     |
| P20674 | COX5A     | Q8TAA3  | PSMA7   | P42126 | ECI1     |
| P20700 | LMNB1     | P09104  | ENO2    | P09093 | CELA3A   |
| P21266 | GSTM3     | P07195  | LDHB    | P35232 | PHB      |
| P21281 | ATP6V1B2  | Q92598  | HSPH1   | P50502 | ST13     |
| P21333 | FLNA      | P48047  | ATP5O   | Q8WXD2 | SCG3     |
| P21397 | MAOA      | P49591  | SARS    | P09874 | PARP1    |
| P21695 | GPD1      | P62491  | RAB11B  | Q9ULU8 | CADPS    |
| P21796 | VDAC1     | Q01469  | FABP5   | P24534 | EEF1B2   |
| P21980 | TGM2      | P04083  | ANXA1   | P30040 | ERP29    |
| P22314 | UBA1      | P61158  | ACTR3   | P26038 | MSN      |
| P22626 | HNRNPA2B1 | P61247  | RPS3A   | P00325 | ADH1B    |
| P22695 | UQCRC2    | P11940  | PABPC1  | P60900 | PSMA6    |
| P23246 | SFPQ      | P62328  | TMSB4X  | P01011 | SERPINA3 |
| P23284 | PPIB      | O43795  | MYO1B   | P02774 | GC       |
| P23396 | RPS3      | Q92499  | DDX1    | Q9UPN3 | MACF1    |
| P23526 | AHCY      | Q13576  | IQGAP2  | P39656 | DDOST    |
| P23528 | CFL1      | P37802  | TAGLN2  | Q9UNL2 | SSR3     |
| P24534 | EEF1B2    | Q3LXA3  | DAK     | P21281 | ATP6V1B2 |
| P24539 | ATP5F1    | P46459  | NSF     | Q99460 | PSMD1    |
| P24752 | ACAT1     | P28161  | GSTM2   | P20073 | ANXA7    |
| P25398 | RPS12     | P55084  | HADHB   | O60701 | UGDH     |
| P25705 | ATP5A1    | Q12905  | ILF2    | P62851 | RPS25    |
| P25786 | PSMA1     | P51149  | RAB7A   | P62249 | RPS16    |
| P25788 | PSMA3     | P49327  | FASN    | P27824 | CANX     |
| P26038 | MSN       | P26885  | FKBP2   | Q9GZS3 | WDR61    |
| P26373 | RPL13     | P42765  | ACAA2   | P13804 | ETFA     |
| P26440 | IVD       | P48444  | ARCN1   | Q16851 | UGP2     |
| P26599 | PTBP1     | Q9NYU2  | UGGT1   | P00338 | LDHA     |
| P26641 | EEF1G     | P31943  | HNRNPH1 | Q8TAA3 | PSMA7    |
| P26885 | FKBP2     | P60842  | EIF4A1  | P09104 | ENO2     |
| P27348 | YWHAQ     | O00159  | MYO1C   | P07195 | LDHB     |
| P27695 | APEX1     | P35221  | CTNNA1  | Q92598 | HSPH1    |
| P27797 | CALR      | P30084  | ECHS1   | O75955 | FLOT1    |
| P27816 | MAP4      | P12429  | ANXA3   | P48047 | ATP5O    |
| P27824 | CANX      | P61106  | RAB14   | P49591 | SARS     |
| P28072 | PSMB6     | P23381  | WARS    | P62491 | RAB11B   |
| P29120 | PCSK1     | O95336  | PGLS    | Q15257 | PPP2R4   |
| P29401 | TKT       | P36871  | PGM1    | Q01469 | FABP5    |
| P30040 | ERP29     | O00231  | PSMD11  | P22695 | UQCRC2   |
| P30041 | PRDX6     | P32119  | PRDX2   | P04083 | ANXA1    |
| P30044 | PRDX5     | P21399  | ACO1    | P61158 | ACTR3    |
| P30046 | DDT;DDTL  | O00429- | DNM1L   | P61247 | RPS3A    |
| P30048 | PRDX3     | P21291  | CSRP1   | P25398 | RPS12    |

|        |          |        |          |         |         |
|--------|----------|--------|----------|---------|---------|
| P30049 | ATP5D    | Q9Y277 | VDAC3    | P11940  | PABPC1  |
| P30050 | RPL12    | Q08257 | CRYZ     | P62328  | TMSB4X  |
| P30085 | CMPK1    | P62753 | RPS6     | O43795  | MYO1B   |
| P30086 | PEBP1    | P39687 | ANP32A   | Q92499  | DDX1    |
| P30101 | PDIA3    | P21980 | TGM2     | Q13576  | IQGAP2  |
| P30626 | SRI      | Q15181 | PPA1     | P37802  | TAGLN2  |
| P30740 | SERPINB1 | Q13423 | NNT      | Q3LXA3  | DAK     |
| P31150 | GDI1     | P31948 | STIP1    | P46459  | NSF     |
| P31930 | UQCRC1   | P17174 | GOT1     | P28161  | GSTM2   |
| P31946 | YWHAB    | P31150 | GDI1     | P55084  | HADHB   |
| P31948 | STIP1    | P40227 | CCT6A    | Q12905  | ILF2    |
| P32119 | PRDX2    | O75390 | CS       | P51149  | RAB7A   |
| P32969 | RPL9     | Q12906 | ILF3     | P49327  | FASN    |
| P34932 | HSPA4    | Q06210 | GFPT1    | P26885  | FKBP2   |
| P35221 | CTNNA1   | Q5JPE7 | NOMO3    | P42765  | ACAA2   |
| P35232 | PHB      | P12110 | COL6A2   | P48444  | ARCN1   |
| P35579 | MYH9     | P07954 | FH       | Q9NYU2  | UGGT1   |
| P35580 | MYH10    | P38117 | ETFB     | P31943  | HNRNPH1 |
| P35606 | COPB2    | Q14697 | GANAB    | P60842  | EIF4A1  |
| P36542 | ATP5C1   | O60825 | PFKFB2   | O00159  | MYO1C   |
| P36543 | ATP6V1E1 | O75874 | IDH1     | P35221  | CTNNA1  |
| P36578 | RPL4     | P84243 | H3F3B    | P30084  | ECHS1   |
| P36871 | PGM1     | P62277 | RPS13    | Q53EL6  | PDCD4   |
| P37108 | SRP14    | P18206 | VCL      | P56192  | MARS    |
| P37802 | TAGLN2   | P62280 | RPS11    | Q92616  | GCN1L1  |
| P37837 | TALDO1   | P52943 | CRIP2    | P12429  | ANXA3   |
| P38117 | ETFB     | Q03252 | LMNB2    | P47985  | UQCDFS1 |
| P38159 | RBMX     | P50454 | SERPINH1 | P61106  | RAB14   |
| P38606 | ATP6V1A  | Q9NVA2 | 42615    | P23381  | WARS    |
| P38646 | HSPA9    | P84077 | ARF1     | O95336  | PGLS    |
| P39019 | RPS19    | Q2L696 | NUCB2    | P60033  | CD81    |
| P39023 | RPL3     | Q9BSJ8 | ESYT1    | P36871  | PGM1    |
| P39656 | DDOST    | O75083 | WDR1     | Q13557  | CAMK2D  |
| P39687 | ANP32A   | P51991 | HNRNPA3  | O00231  | PSMD11  |
| P40227 | CCT6A    | Q86UP2 | KTN1     | P32119  | PRDX2   |
| P40429 | RPL13A   | Q9BT78 | COPS4    | P21399  | ACO1    |
| P40925 | MDH1     | O94979 | SEC31A   | Q9UBI6  | GNG12   |
| P40926 | MDH2     | O43242 | PSMD3    | O00429- | DNM1L   |
| P40939 | HADHA    | P43490 | NAMPT    | P36542  | ATP5C1  |
| P42704 | LRPPRC   | Q14764 | MVP      | P21291  | CSRP1   |
| P42765 | ACAA2    | Q8WUM4 | PDCD6IP  | Q9Y277  | VDAC3   |
| P42766 | RPL35    | Q92841 | DDX17    | Q86Y82  | STX12   |
| P45880 | VDAC2    | Q06323 | PSME1    | Q08257  | CRYZ    |
| P46459 | NSF      | P55145 | MANF     | P62753  | RPS6    |
| P46777 | RPL5     | Q9NQW7 | XPNPEP1  | P20810  | CAST    |
| P46778 | RPL21    | P07814 | EPRS     | P39687  | ANP32A  |
| P46781 | RPS9     | P68366 | TUBA4A   | P21980  | TGM2    |
| P46782 | RPS5     | P13797 | PLS3     | Q15181  | PPA1    |
| P46821 | MAP1B    | Q9Y6N5 | SQRDL    | Q13423  | NNT     |
| P46940 | IQGAP1   | P05091 | ALDH2    | P31948  | STIP1   |

|        |         |        |                   |        |           |
|--------|---------|--------|-------------------|--------|-----------|
| P46976 | GYG1    | P38606 | ATP6V1A           | P17174 | GOT1      |
| P46977 | STT3A   | P50991 | CCT4              | P31150 | GDI1      |
| P47755 | CAPZA2  | Q5SZU1 | PHGDH             | Q7Z6Z7 | HUWE1     |
| P47756 | CAPZB   | Q86UP6 | CUZD1             | P61081 | UBE2M     |
| P48047 | ATP5O   | O75643 | SNRNP200          | P40227 | CCT6A     |
| P48052 | CPA2    | Q14103 | HNRNPD            | O75390 | CS        |
| P48444 | ARCN1   | Q13765 | NACA              | Q12906 | ILF3      |
| P48637 | GSS     | P19404 | NDUFV2            | Q06210 | GFPT1     |
| P48643 | CCT5    | Q14152 | EIF3A             | Q5JPE7 | NOMO3     |
| P49189 | ALDH9A1 | Q93050 | ATP6VOA1          | P12110 | COL6A2    |
| P49257 | LMAN1   | P52597 | HNRNPF            | P07954 | FH        |
| P49368 | CCT3    | P22033 | MUT               | O76094 | SRP72     |
| P49411 | TUFM    | P11177 | PDHB              | P04080 | CSTB      |
| P49588 | AARS    | O75348 | ATP6V1G1          | P09467 | FBP1      |
| P49748 | ACADVL  | P20231 | TPSAB1            | P38117 | ETFB      |
| P49755 | TMED10  | P16422 | EPCAM             | Q14697 | GANAB     |
| P49773 | HINT1   | Q15437 | SEC23B            | P36543 | ATP6V1E1  |
| P50213 | IDH3A   | Q02878 | RPL6              | O60825 | PFKFB2    |
| P50395 | GDI2    | Q9BTT0 | ANP32E            | O75874 | IDH1      |
| P50440 | GATM    | P0CW22 | RPS17L            | P33778 | HIST2H2BE |
| P50502 | ST13    | O00571 | DDX3X             | P84243 | H3F3B     |
| P50914 | RPL14   | P67936 | TPM4              | P62277 | RPS13     |
| P50990 | CCT8    | P10253 | GAA               | P62854 | RPS26     |
| P50991 | CCT4    | P20340 | RAB6A             | P50995 | ANXA11    |
| P51148 | RAB5C   | P46977 | STT3A             | P18206 | VCL       |
| P51149 | RAB7A   | P33176 | KIF5B             | P61803 | DAD1      |
| P51572 | BCAP31  | P35222 | CTNNB1            | P62280 | RPS11     |
| P51608 | MECP2   | P51148 | RAB5C             | P52943 | CRIP2     |
| P51858 | HDGF    | Q9UJS0 | SLC25A13          | Q03252 | LMNB2     |
| P51991 | HNRNPA3 | Q13724 | MOGS              | P59998 | ARPC4     |
| P52209 | PGD     | P52209 | PGD               | P50454 | SERPINH1  |
| P52272 | HNRNPM  | Q9Y265 | RUVBL1            | Q9NVA2 | 42615     |
| P52565 | ARHGDI  | P29120 | PCSK1             | P84077 | ARF1      |
| P53007 | SLC25A1 | P07108 | DBI               | Q2L696 | NUCB2     |
| P53396 | ACLY    | P21266 | GSTM3             | P48637 | GSS       |
| P53618 | COPB1   | P11216 | PYGB              | Q9BSJ8 | ESYT1     |
| P53621 | COPA    | P21283 | ATP6V1C1          | O75083 | WDR1      |
| P54727 | RAD23B  | Q12931 | TRAP1             | P51991 | HNRNPA3   |
| P55072 | VCP     | Q53GQ0 | HSD17B12          | O43776 | NARS      |
| P55084 | HADHB   | P16519 | PCSK2             | Q86UP2 | KTN1      |
| P55327 | TPD52   | P05556 | ITGB1             | P63027 | VAMP2     |
| P59768 | GNG2    | Q14974 | KPNB1             | Q9BT78 | COPS4     |
| P59998 | ARPC4   | P62140 | PPP1CB            | O94979 | SEC31A    |
| P60174 | TPI1    | P62906 | RPL10A            | O43242 | PSMD3     |
| P60866 | RPS20   | P41252 | IARS              | Q9H223 | EHD4      |
| P60891 | PRPS1   | P09651 | HNRNPA1;HNRNPA1L2 | P43490 | NAMPT     |
| P60900 | PSMA6   | O94874 | UFL1              | O94855 | SEC24D    |
| P60953 | CDC42   | Q96QK1 | VPS35             | Q14764 | MVP       |
| P60981 | DSTN    | P22392 | NME2              | Q8WUM4 | PDCD6IP   |
| P61009 | SPCS3   | P31946 | YWHAB             | Q9NYL4 | FKBP11    |



|        |           |        |           |        |          |
|--------|-----------|--------|-----------|--------|----------|
| P61019 | RAB2A     | P17844 | DDX5      | P61764 | STXBP1   |
| P61026 | RAB10     | P78417 | GSTO1     | Q92841 | DDX17    |
| P61081 | UBE2M     | P01009 | SERPINA1  | Q06323 | PSME1    |
| P61088 | UBE2N     | Q02978 | SLC25A11  | P55145 | MANF     |
| P61106 | RAB14     | Q9H2U2 | PPA2      | Q9NQW7 | XPNPEP1  |
| P61158 | ACTR3     | P51659 | HSD17B4   | P07814 | EPRS     |
| P61224 | RAP1B     | Q13263 | TRIM28    | P62266 | RPS23    |
| P61247 | RPS3A     | O00151 | PDLIM1    | P68366 | TUBA4A   |
| P61254 | RPL26     | Q86YB8 | ERO1LB    | P13797 | PLS3     |
| P61313 | RPL15     | P32969 | RPL9      | Q9NWW4 | C1orf123 |
| P61353 | RPL27     | P14868 | DARS      | Q07960 | ARHGAP1  |
| P61586 | RHOA      | P61981 | YWHAG     | Q9Y6N5 | SQRDL    |
| P61604 | HSPE1     | Q9HC38 | GLOD4     | P05091 | ALDH2    |
| P61619 | SEC61A1   | Q9Y224 | C14orf166 | P38606 | ATP6V1A  |
| P61764 | STXBP1    | P18124 | RPL7      | O14773 | TPP1     |
| P61769 | B2M       | Q16531 | DDB1      | P50991 | CCT4     |
| P61803 | DAD1      | P26368 | U2AF2     | Q5SZU1 | PHGDH    |
| P61916 | NPC2      | P20700 | LMNB1     | P43487 | RANBP1   |
| P61978 | HNRNPK    | P16615 | ATP2A2    | P49419 | ALDH7A1  |
| P61981 | YWHAG     | Q9UNM6 | PSMD13    | Q86UP6 | CUZD1    |
| P62081 | RPS7      | P49257 | LMAN1     | O75643 | SNRNP200 |
| P62140 | PPP1CB    | P49720 | PSMB3     | Q14103 | HNRNPD   |
| P62158 | CALM2     | Q9Y5M8 | SRPRB     | Q13765 | NACA     |
| P62195 | PSMC5     | Q9NUJ1 | ABHD10    | Q9Y646 | CPQ      |
| P62241 | RPS8      | P19105 | MYL12A    | P06748 | NPM1     |
| P62244 | RPS15A    | P41091 | EIF2S3    | P19404 | NDUFV2   |
| P62249 | RPS16     | Q9UHL4 | DPP7      | Q9NVD7 | PARVA    |
| P62258 | YWHAE     | P54136 | RARS      | P34913 | EPHX2    |
| P62263 | RPS14     | P54920 | NAPA      | Q14152 | EIF3A    |
| P62269 | RPS18     | Q9NSD9 | FARSB     | P62495 | ETF1     |
| P62277 | RPS13     | P54886 | ALDH18A1  | Q5VYK3 | ECM29    |
| P62280 | RPS11     | P62826 | RAN       | Q93050 | ATP6V0A1 |
| P62328 | TMSB4X    | Q14980 | NUMA1     | P01298 | PPY      |
| P62424 | RPL7A     | Q6NZI2 | PTRF      | P22059 | OSBP     |
| P62701 | RPS4X     | P26639 | TARS      | O94760 | DDAH1    |
| P62750 | RPL23A    | P51608 | MECP2     | P52597 | HNRNPF   |
| P62753 | RPS6      | P01033 | TIMP1     | P22033 | MUT      |
| P62805 | HIST1H4A  | P23246 | SFPQ      | P11177 | PDHB     |
| P62807 | HIST1H2BN | P51858 | HDGF      | O75348 | ATP6V1G1 |
| P62826 | RAN       | Q9P2J5 | LARS      | P31937 | HIBADH   |
| P62829 | RPL23     | P05386 | RPLP1     | P20231 | TPSAB1   |
| P62851 | RPS25     | Q05682 | CALD1     | P46783 | RPS10    |
| P62879 | GNB2      | P04899 | GNAI2     | P16422 | EPCAM    |
| P62888 | RPL30     | Q00577 | PURA      | Q16769 | QPCT     |
| P62906 | RPL10A    | P50914 | RPL14     | Q15437 | SEC23B   |
| P62913 | RPL11     | Q9HCJ6 | VAT1L     | Q02878 | RPL6     |
| P62917 | RPL8      | Q9UMS4 | PRPF19    | Q9BTT0 | ANP32E   |
| P62937 | PPIA      | P18859 | ATP5J     | P36405 | ARL3     |
| P63010 | AP1B1     | O60716 | CTNND1    | P37108 | SRP14    |
| P63027 | VAMP2     | Q99613 | EIF3C     | Q709C8 | VPS13C   |

|        |          |        |          |        |           |
|--------|----------|--------|----------|--------|-----------|
| P63092 | GNAS     | P10515 | DLAT     | P0CW22 | RPS17L    |
| P63104 | YWHAZ    | Q13501 | SQSTM1   | O00571 | DDX3X     |
| P63167 | DYNLL2   | P23526 | AHCY     | P67936 | TPM4      |
| P63220 | RPS21    | P36957 | DLST     | P46782 | RPS5      |
| P63241 | EIF5A    | Q00341 | HDLBP    | P10253 | GAA       |
| P63244 | GNB2L1   | P61088 | UBE2N    | P51648 | ALDH3A2   |
| P67936 | TPM4     | P17987 | TCP1     | P20340 | RAB6A     |
| P68366 | TUBA4A   | P00918 | CA2      | Q9NY33 | DPP3      |
| P68371 | TUBB4B   | O1;QA1 | PDCD5    | P17655 | CAPN2     |
| P68871 | HBB      | P09429 | HMGB1    | P46977 | STT3A     |
| P78371 | CCT2     | P61353 | RPL27    | P33176 | KIF5B     |
| P78527 | PRKDC    | Q86UY0 | TXNDC5   | P35222 | CTNNB1    |
| P80297 | ABAT     | P17858 | PFKL     | P51148 | RAB5C     |
| P80303 | NUCB2    | P07384 | CAPN1    | Q9UJS0 | SLC25A13  |
| P83916 | ARF1     | P43307 | SSR1     | Q13724 | MOGS      |
| P84157 | H3F3B    | P05026 | ATP1B1   | P13798 | APEH      |
| Q00325 | SLC25A3  | Q9UQ80 | PA2G4    | P11047 | LAMC1     |
| Q00341 | HDLBP    | P14923 | JUP      | P52209 | PGD       |
| Q00577 | PURA     | P39019 | RPS19    | Q9Y265 | RUVBL1    |
| Q00610 | CLTC     | Q16799 | RTN1     | P29120 | PCSK1     |
| Q00796 | SORD     | Q99832 | CCT7     | Q8NCW5 | APOA1BP   |
| Q00839 | HNRNPU   | P17980 | PSMC3    | P07108 | DBI       |
| Q01082 | SPTBN1   | Q16698 | DECR1    | P21266 | GSTM3     |
| Q01433 | AMPD2    | P05534 | HLA-A    | P11216 | PYGB      |
| Q01469 | FABP5    | P11586 | MTHFD1   | Q16401 | PSMD5     |
| Q01518 | CAP1     | Q04637 | EIF4G1   | P48147 | PREP      |
| Q02543 | RPL18A   | Q3SY69 | ALDH1L2  | P50851 | LRBA      |
| Q02878 | RPL6     | O60763 | USO1     | Q96CX2 | KCTD12    |
| Q03252 | LMNB2    | O43396 | TXNL1    | P21283 | ATP6V1C1  |
| Q04917 | YWHAH    | P62081 | RPS7     | Q12931 | TRAP1     |
| Q05682 | CALD1    | P60866 | RPS20    | Q53GQ0 | HSD17B12  |
| Q05BJ3 | VGf      | Q14165 | MLEC     | P16519 | PCSK2     |
| Q05BK6 | TFG      | P62191 | PSMC1    | P05556 | ITGB1     |
| Q06323 | PSME1    | O43747 | AP1G1    | Q14974 | KPNB1     |
| Q06830 | PRDX1    | Q9Y310 | RTCB     | P51812 | RPS6KA3   |
| Q07020 | RPL18    | P28289 | TMOD1    | P62140 | PPP1CB    |
| Q07021 | C1QBP    | Q14194 | CRMP1    | P62906 | RPL10A    |
| Q07065 | CKAP4    | P12268 | IMPDH2   | P41252 | IARS      |
| Q07955 | SRSF1    | P07858 | CTSB     | P09417 | QDPR      |
| Q07960 | ARHGAP1  | Q02218 | OGDH     | P09758 | TACSTD2   |
| Q08211 | DHX9     | P15880 | RPS2     | P09651 | HNRNPA1;f |
| Q08257 | CRYZ     | Q07955 | SRSF1    | O94874 | UFL1      |
| Q08380 | LGALS3BP | O95340 | PAPSS2   | Q96QK1 | VPS35     |
| Q09666 | AHNAK    | O95831 | AIFM1    | Q15029 | EFTUD2    |
| Q1;P43 | SSR1     | Q14240 | EIF4A2   | P22392 | NME2      |
| Q12905 | ILF2     | Q9HDC9 | APMAP    | O94875 | SORBS2    |
| Q12906 | ILF3     | P62701 | RPS4X    | P31946 | YWHAB     |
| Q13087 | PDIA2    | O75947 | SLC25A12 | P17844 | DDX5      |
| Q13162 | PRDX4    | Q9UBS4 | DNAJB11  | P78417 | GSTO1     |
| Q13247 | SRSF6    | Q99873 | PRMT1    | P01009 | SERPINA1  |

|        |            |        |           |        |           |
|--------|------------|--------|-----------|--------|-----------|
| Q13363 | CTBP1      | Q92506 | HSD17B8   | Q9UHX1 | PUF60     |
| Q13423 | NNT        | Q15691 | MAPRE1    | P31942 | HNRNPH3   |
| Q13451 | FKBP5      | P11310 | ACADM     | Q02978 | SLC25A11  |
| Q13557 | CAMK2D     | Q9H4A4 | RNPEP     | Q9H2U2 | PPA2      |
| Q13561 | DCTN2      | Q9P0M6 | H2AFY2    | P51659 | HSD17B4   |
| Q13740 | ALCAM      | P21695 | GPD1      | Q13263 | TRIM28    |
| Q13765 | NACA       | P04746 | AMY2A     | P63092 | GNAS      |
| Q13813 | SPTAN1     | O94832 | MYO1D     | O00151 | PDLIM1    |
| Q13838 | DDX39B     | O43143 | DHX15     | Q86YB8 | ERO1LB    |
| Q14011 | CIRBP      | P07737 | PFN1      | P32969 | RPL9      |
| Q14103 | HNRNPD     | Q9UH03 | 42620     | P14868 | DARS      |
| Q14194 | CRMP1      | P21397 | MAOA      | P61981 | YWHAG     |
| Q14204 | DYNC1H1    | P55209 | NAP1L1    | Q9HC38 | GLOD4     |
| Q14240 | EIF4A2     | P53597 | SUCLG1    | P21912 | SDHB      |
| Q14697 | GANAB      | P40429 | RPL13A    | O00303 | EIF3F     |
| Q14974 | KPNB1      | P61163 | ACTR1A    | P55259 | GP2       |
| Q15084 | PDIA6      | Q9NP72 | RAB18     | Q9Y224 | C14orf166 |
| Q15233 | NONO       | P0C0S5 | H2AFV     | Q9H845 | ACAD9     |
| Q15293 | RCN1       | Q8N398 | VWA5B2    | P18124 | RPL7      |
| Q15365 | PCBP1      | P46776 | RPL27A    | P30042 | C21orf33  |
| Q15366 | PCBP2      | Q96FW1 | OTUB1     | P35611 | ADD1      |
| Q15437 | SEC23B     | P61923 | COPZ1     | Q9UK22 | FBXO2     |
| Q15691 | MAPRE1     | O14979 | HNRNPD    | Q16531 | DDB1      |
| Q15717 | ELAVL1     | Q15366 | PCBP2     | P26368 | U2AF2     |
| Q16270 | IGFBP7     | Q9Y2Q0 | ATP8A1    | O14617 | AP3D1     |
| Q16555 | DPYSL2     | Q15046 | KARS      | P62714 | PPP2CB    |
| Q16698 | DECR1      | Q15424 | SAFB      | P20700 | LMNB1     |
| Q16799 | RTN1       | P35998 | PSMC2     | P16615 | ATP2A2    |
| Q16836 | HADH       | Q15631 | TSN       | P36776 | LONP1     |
| Q16891 | IMMT       | P22087 | FBL       | P34897 | SHMT2     |
| Q53GQ0 | HSD17B12   | P69905 | HBA1;HBA2 | Q9BW30 | TPPP3     |
| Q5JP53 | TUBB       | Q15293 | RCN1      | P62333 | PSMC6     |
| Q5SSJ5 | HP1BP3     | P13861 | PRKAR2A   | Q9UNM6 | PSMD13    |
| Q5T8U5 | SURF4      | P14314 | PRKCSH    | P49257 | LMAN1     |
| Q5TA02 | GSTO1      | O75947 | ATP5H     | Q8N5K1 | CISD2     |
| Q5TEC6 | HIST2H3PS2 | P30153 | PPP2R1A   | P49720 | PSMB3     |
| Q5VTE0 | EEF1A1     | Q9NQC3 | RTN4      | Q01433 | AMPD2     |
| Q68E03 | MATR3      | P09455 | RBP1      | Q14498 | RBM39     |
| Q6GPI1 | CTRB2      | Q9Y6C9 | MTCH2     | P49588 | AARS      |
| Q6NVY1 | HIBCH      | Q00325 | SLC25A3   | Q9Y5M8 | SRPRB     |
| Q6UXG2 | KIAA1324   | Q15393 | SF3B3     | Q9NUJ1 | ABHD10    |
| Q7KZF4 | SND1       | P49821 | NDUFV1    | P19105 | MYL12A    |
| Q86UP2 | KTN1       | P31040 | SDHA      | P51571 | SSR4      |
| Q86UY0 | TXNDC5     | Q96HE7 | ERO1L     | P41091 | EIF2S3    |
| Q86VP6 | CAND1      | Q12765 | SCRN1     | Q9UHL4 | DPP7      |
| Q86YB8 | ERO1LB     | P48643 | CCT5      | P54136 | RARS      |
| Q8NC51 | SERBP1     | P20042 | EIF2S2    | P54920 | NAPA      |
| Q8WUM4 | PDCD6IP    | P09210 | GSTA2     | P23368 | ME2       |
| Q8WXD2 | SCG3       | P49755 | TMED10    | Q9NSD9 | FARSB     |
| Q92522 | H1FX       | O75131 | CPNE3     | P54886 | ALDH18A1  |

|        |          |        |            |        |          |
|--------|----------|--------|------------|--------|----------|
| Q92747 | ARPC1A   | P00167 | CYB5A      | P62826 | RAN      |
| Q92841 | DDX17    | Q96IU4 | ABHD14B    | Q14980 | NUMA1    |
| Q92945 | KHSRP    | Q9Y230 | RUVBL2     | Q6NZI2 | PTRF     |
| Q93050 | ATP6V0A1 | P30046 | DDT;DDTL   | P26639 | TARS     |
| Q93084 | ATP2A3   | Q9Y262 | EIF3L      | Q96JB5 | CDK5RAP3 |
| Q96AE4 | FUBP1    | P30085 | CMPK1      | P52907 | CAPZA1   |
| Q96AG4 | LRRRC59  | O15173 | PGRMC2     | P51608 | MECP2    |
| Q96E17 | RAB3C    | Q92945 | KHSRP      | P43155 | CRAT     |
| Q96HN2 | AHCYL1   | P10606 | COX5B      | P01033 | TIMP1    |
| Q96IU4 | ABHD14B  | P28838 | LAP3       | P06454 | PTMA     |
| Q96KP4 | CNDP2    | Q9P2R7 | SUCLA2     | P23246 | SFPQ     |
| Q96QK1 | VPS35    | Q9UIJ7 | AK3        | Q5T760 | SRSF11   |
| Q99497 | PARK7    | P35637 | FUS        | P51858 | HDGF     |
| Q99536 | VAT1     | P61421 | ATP6VOD1   | P60981 | DSTN     |
| Q99623 | PHB2     | P25789 | PSMA4      | Q9P2J5 | LARS     |
| Q99714 | HSD17B10 | P47897 | QARS       | P04216 | THY1     |
| Q99798 | ACO2     | P05166 | PCCB       | Q01813 | PFKP     |
| Q99832 | CCT7     | P39023 | RPL3       | O43399 | TPD52L2  |
| Q99895 | CTRC     | P16989 | YBX3       | P05386 | RPLP1    |
| Q9BS26 | ERP44    | Q9UBX3 | MRPL12     | Q05682 | CALD1    |
| Q9BVK6 | TMED9    | Q15075 | EEA1       | P04899 | GNAI2    |
| Q9H223 | EHD4     | P55735 | SEC13      | Q00577 | PURA     |
| Q9H2U2 | PPA2     | Q9Y3F4 | STRAP      | P50914 | RPL14    |
| Q9H3N1 | TMX1     | Q96AE4 | FUBP1      | Q9NS69 | TOMM22   |
| Q9H8H3 | METTLL7A | P54819 | AK2        | Q9HCJ6 | VAT1L    |
| Q9H9B4 | SFXN1    | P05362 | ICAM1      | Q9UMS4 | PRPF19   |
| Q9HC38 | GLOD4    | Q9BUJ2 | HNRNPUL1   | Q5QPE4 | SNX5     |
| Q9HDC9 | APMAP    | P62269 | RPS18      | P18859 | ATP5J    |
| Q9NQC3 | RTN4     | Q96DX5 | ASB9       | O60716 | CTNND1   |
| Q9NR45 | NANS     | P51159 | RAB27A     | Q99613 | EIF3C    |
| Q9NSD9 | FARSB    | P62195 | PSMC5      | P10515 | DLAT     |
| Q9NUJ1 | ABHD10   | O14980 | XPO1       | Q13501 | SQSTM1   |
| Q9NYL4 | FKBP11   | P12270 | Tpr;TPR    | P35241 | RDX      |
| Q9NZ45 | CISD1    | Q12888 | TP53BP1    | P09496 | CLTA     |
| Q9P0M6 | H2AFY2   | P43686 | PSMC4      | P16278 | GLB1     |
| Q9P2E9 | RRBP1    | O75368 | SH3BGRL    | P61289 | PSME3    |
| Q9P2R7 | SUCLA2   | P43034 | PAFAH1B1   | P30520 | ADSS     |
| Q9UBI6 | GNG12    | P38159 | RBMX       | O94973 | AP2A2    |
| Q9UHG2 | PCSK1N   | Q9BZZ5 | API5       | P23526 | AHCY     |
| Q9UHG3 | PCYOX1   | Q99733 | NAP1L4     | P36957 | DLST     |
| Q9UHL4 | DPP7     | P22102 | GART       | Q00341 | HDLBP    |
| Q9UI12 | ATP6V1H  | Q01105 | SET;SETSIP | Q9BPX5 | ARPC5L   |
| Q9UJS0 | SLC25A12 | P16070 | CD44       | P14866 | HNRNPPL  |
| Q9ULU8 | CADPS    | P04632 | CAPNS1     | P16083 | NQO2     |
| Q9UQ80 | PA2G4    | A6NMZ7 | ERLIN2     | P61088 | UBE2N    |
| Q9Y2J2 | EPB41L3  | P09543 | CNP        | P17987 | TCP1     |
| Q9Y2T3 | GDA      | Q07021 | C1QBP      | P00918 | CA2      |
| Q9Y490 | TLN1     | O95716 | RAB3D      | O95168 | NDUFB4   |
| Q9Y4L1 | HYOU1    | O95861 | BPNT1      | O1;QA1 | PDCD5    |
| Q9Y678 | COPG1    | Q9UKY7 | CDV3       | P09429 | HMGB1    |

|        |       |        |          |        |          |
|--------|-------|--------|----------|--------|----------|
| Q9Y6B6 | SAR1B | Q15904 | ATP6AP1  | P61353 | RPL27    |
| Q9Y6C9 | MTCH2 | P19021 | PAM      | P21953 | BCKDHB   |
|        |       | P09471 | GNAO1    | Q969H8 | C19orf10 |
|        |       | P33121 | ACSL1    | Q86UY0 | TXNDC5   |
|        |       | O60313 | OPA1     | Q14203 | DCTN1    |
|        |       | P23634 | ATP2B4   | P07741 | APRT     |
|        |       | Q9UNZ2 | NSFL1C   | P17858 | PFKL     |
|        |       | P61224 | RAP1B    | Q99895 | CTRC     |
|        |       | P08621 | SNRNP70  | P07384 | CAPN1    |
|        |       | Q9UHG3 | PCYOX1   | P43307 | SSR1     |
|        |       | Q13435 | SF3B2    | Q13151 | HNRNPA0  |
|        |       | P10768 | ESD      | Q9NVI7 | ATAD3A   |
|        |       | O60784 | TOM1     | Q6P996 | PDXDC1   |
|        |       | P08240 | SRPR     | P05026 | ATP1B1   |
|        |       | Q9Y5K8 | ATP6V1D  | Q9UQ80 | PA2G4    |
|        |       | P62861 | FAU      | O00410 | IPO5     |
|        |       | Q16629 | SRSF7    | P14923 | JUP      |
|        |       | P61009 | SPCS3    | P39019 | RPS19    |
|        |       | Q9Y2J2 | EPB41L3  | Q14789 | GOLGB1   |
|        |       | P54727 | RAD23B   | P09622 | DLD      |
|        |       | Q8TB36 | GDAP1    | Q16799 | RTN1     |
|        |       | Q9UJZ1 | STOML2   | Q16718 | NDUFA5   |
|        |       | P63000 | RAC1     | Q9Y394 | DHRS7    |
|        |       | Q6NVY1 | HIBCH    | Q99832 | CCT7     |
|        |       | P62244 | RPS15A   | Q86U42 | PABPN1   |
|        |       | Q9Y2T2 | AP3M1    | P17980 | PSMC3    |
|        |       | O14745 | SLC9A3R1 | Q16698 | DECR1    |
|        |       | O95292 | VAPB     | P05534 | HLA-A    |
|        |       | P28066 | PSMA5    | P11586 | MTHFD1   |
|        |       | Q96FJ2 | DYNLL2   | Q04637 | EIF4G1   |
|        |       | P18085 | ARF4     | Q3SY69 | ALDH1L2  |
|        |       | P61586 | RHOA     | P47756 | CAPZB    |
|        |       | Q6UXG2 | KIAA1324 | O60763 | USO1     |
|        |       | P04054 | PLA2G1B  | O14744 | PRMT5    |
|        |       | P30626 | SRI      | Q92520 | FAM3C    |
|        |       | Q9Y3E1 | HDGFRP3  | O43396 | TXNL1    |
|        |       | P13073 | COX4I1   | O75533 | SF3B1    |
|        |       | Q9H3P7 | ACBD3    | P62081 | RPS7     |
|        |       | P08217 | CELA2A   | P60866 | RPS20    |
|        |       | P62917 | RPL8     | P56134 | ATP5J2   |
|        |       | Q13409 | DYNC1I2  | Q16706 | MAN2A1   |
|        |       | P48556 | PSMD8    | Q14165 | MLEC     |
|        |       | A0MZ66 | KIAA1598 | P62191 | PSMC1    |
|        |       | Q13148 | TARDBP   | O75396 | SEC22B   |
|        |       | Q9H3N1 | TMX1     | O43747 | AP1G1    |
|        |       | Q9Y2Q3 | GSTK1    | Q9Y3I0 | RTCB     |
|        |       | P68036 | UBE2L3   | Q05BK6 | TFG      |
|        |       |        |          | P28289 | TMOD1    |
|        |       |        |          | Q14194 | CRMP1    |
|        |       |        |          | O15511 | ARPC5    |

|        |          |
|--------|----------|
| Q8N1G4 | LRRC47   |
| P12268 | IMPDH2   |
| O75110 | ATP9A    |
| P07858 | CTSB     |
| Q02218 | OGDH     |
| Q86UE4 | MTDH     |
| P15880 | RPS2     |
| Q07955 | SRSF1    |
| O95340 | PAPSS2   |
| P08237 | PFKM     |
| O95831 | AIFM1    |
| Q14240 | EIF4A2   |
| P35749 | MYH11    |
| Q9HDC9 | APMAP    |
| P62701 | RPS4X    |
| O75947 | SLC25A12 |
| Q9UBS4 | DNAJB11  |
| Q99873 | PRMT1    |
| P61769 | B2M      |
| Q92506 | HSD17B8  |
| Q15691 | MAPRE1   |
| P11310 | ACADM    |
| P12081 | HARS     |
| Q9H4A4 | RNPEP    |
| Q9P0M6 | H2AFY2   |
| Q02543 | RPL18A   |
| P22234 | PAICS    |
| P21695 | GPD1     |
| P04746 | AMY2A    |
| O95674 | CDS2     |
| Q7L2H7 | EIF3M    |
| P42766 | RPL35    |
| O00170 | AIP      |
| O94832 | MYO1D    |
| O43143 | DHX15    |
| Q16186 | ADRM1    |
| Q6NUK1 | SLC25A24 |
| P28482 | MAPK1    |
| P07737 | PFN1     |
| Q9UH03 | 42620    |
| P21397 | MAOA     |
| Q8IXI2 | RHOT1    |
| Q9UKK9 | NUDT5    |
| P10155 | TROVE2   |
| P55209 | NAP1L1   |
| P28288 | ABCD3    |
| P99999 | CYCS     |
| P54577 | YARS     |
| Q9HAV7 | GRPEL1   |
| P53597 | SUCLG1   |

|        |           |
|--------|-----------|
| Q92973 | TNPO1     |
| Q9NZL9 | MAT2B     |
| P35270 | SPR       |
| P40429 | RPL13A    |
| Q9H4G0 | EPB41L1   |
| Q9UHV9 | PFDN2     |
| P61163 | ACTR1A    |
| Q9NP72 | RAB18     |
| P0C0S5 | H2AFV     |
| Q6P2Q9 | PRPF8     |
| Q8N398 | VWA5B2    |
| P40763 | STAT3     |
| P23786 | CPT2      |
| P46776 | RPL27A    |
| Q96FW1 | OTUB1     |
| P61923 | COPZ1     |
| O14979 | HNRNPDL   |
| Q15366 | PCBP2     |
| Q9Y2Q0 | ATP8A1    |
| Q15046 | KARS      |
| Q96DH6 | IGSF9B    |
| O14579 | COPE      |
| P12235 | SLC25A4   |
| Q16849 | PTPRN     |
| P26373 | RPL13     |
| Q13310 | PABPC4    |
| Q15424 | SAFB      |
| P55036 | PSMD4     |
| P00568 | AK1       |
| Q96CN7 | ISOC1     |
| P35998 | PSMC2     |
| Q15631 | TSN       |
| Q9UHB9 | SRP68     |
| O75964 | ATP5L     |
| Q9NTJ5 | SACM1L    |
| P22087 | FBL       |
| P69905 | HBA1;HBA2 |
| Q93009 | USP7      |
| Q15293 | RCN1      |
| P13861 | PRKAR2A   |
| P14314 | PRKCSH    |
| O75947 | ATP5H     |
| P30153 | PPP2R1A   |
| P16403 | HIST1H1C  |
| Q9NQC3 | RTN4      |
| P09455 | RBP1      |
| Q9Y6C9 | MTCH2     |
| O75347 | TBCA      |
| O95299 | NDUFA10   |
| Q92905 | COPS5     |

|        |          |
|--------|----------|
| Q13057 | COASY    |
| Q00325 | SLC25A3  |
| O00534 | VWA5A    |
| O00330 | PDHX     |
| Q9UBT2 | UBA2     |
| Q15393 | SF3B3    |
| P46778 | RPL21    |
| P04181 | OAT      |
| P49821 | NDUFV1   |
| P62750 | RPL23A   |
| P50213 | IDH3A    |
| P31040 | SDHA     |
| P31153 | MAT2A    |
| P14678 | SNRPN    |
| Q96HE7 | ERO1L    |
| Q12765 | SCRN1    |
| Q5JTV8 | TOR1AIP1 |
| Q16543 | CDC37    |
| P48643 | CCT5     |
| Q9BVK6 | TMED9    |
| Q16762 | TST      |
| P20042 | EIF2S2   |
| P09210 | GSTA2    |
| P49755 | TMED10   |
| Q96G03 | PGM2     |
| P68402 | PAFAH1B2 |
| P08559 | PDHA1    |
| Q14011 | CIRBP    |
| O43681 | ASNA1    |
| Q12904 | AIMP1    |
| Q15056 | EIF4H    |
| O75131 | CPNE3    |
| Q16134 | ETFDH    |
| O15126 | SCAMP1   |
| P00167 | CYB5A    |
| P61160 | ACTR2    |
| Q8NBQ5 | HSD17B11 |
| Q6NUQ4 | TMEM214  |
| P42224 | STAT1    |
| P17301 | ITGA2    |
| P00492 | HPRT1    |
| Q14247 | CTTN     |
| Q96IU4 | ABHD14B  |
| Q9Y230 | RUVBL2   |
| P00491 | PNP      |
| P30046 | DDT;DDTL |
| Q9Y262 | EIF3L    |
| Q16623 | STX1A    |
| P09488 | GSTM1    |
| Q9C002 | NMES1    |



|          |          |
|----------|----------|
| P30085   | CMPK1    |
| Q13200   | PSMD2    |
| O94826   | TOMM70A  |
| P51649   | ALDH5A1  |
| O15173   | PGRMC2   |
| P42167   | TMPO     |
| P49753   | ACOT1    |
| Q9H3Z4   | DNAJC5   |
| Q02818   | NUCB1    |
| Q92945   | KHSRP    |
| P10606   | COX5B    |
| P28838   | LAP3     |
| O15144   | ARPC2    |
| Q9P2R7   | SUCLA2   |
| Q9UIJ7   | AK3      |
| Q8WXF1   | PSPC1    |
| P35637   | FUS      |
| P30039   | PBLD     |
| P61421   | ATP6V0D1 |
| P04066   | FUCA1    |
| Q9NTK5   | OLA1     |
| P08861   | CELA3B   |
| Q9NR30   | DDX21    |
| Q52LJ0   | FAM98B   |
| Q63HM9   | PLCXD3   |
| P51553   | IDH3G    |
| Q5JRX3   | PITRM1   |
| P25789   | PSMA4    |
| P53999   | SUB1     |
| Q6DD88   | ATL3     |
| P13716   | ALAD     |
| P20618   | PSMB1    |
| Q9HD20   | ATP13A1  |
| P47897   | QARS     |
| P05166   | PCCB     |
| Q9UMX5   | NENF     |
| P27338   | MAOB     |
| O94925-3 | GLS      |
| Q15008   | PSMD6    |
| P19525   | EIF2AK2  |
| P68400   | CSNK2A1  |
| O43678   | NDUFA2   |
| P39023   | RPL3     |
| Q9UIA9   | XPO7     |
| P60891   | PRPS1    |
| P16989   | YBX3     |
| Q16864   | ATP6V1F  |
| O15382   | BCAT2    |
| P30837   | ALDH1B1  |
| Q9NZN4   | EHD2     |

|        |          |
|--------|----------|
| P27695 | APEX1    |
| P63010 | AP2B1    |
| Q9UBX3 | MRPL12   |
| P62310 | LSM3     |
| P53992 | SEC24C   |
| Q15075 | EEA1     |
| Q8N163 | CCAR2    |
| P55735 | SEC13    |
| O00203 | AP3B1    |
| Q9Y3F4 | STRAP    |
| O95747 | OXSRI    |
| Q96AE4 | FUBP1    |
| Q9UM54 | MYO6     |
| Q9UHY7 | ENOPH1   |
| P49589 | CARS     |
| P54819 | AK2      |
| P05455 | SSB      |
| Q9Y2T3 | GDA      |
| P05362 | ICAM1    |
| Q9BUJ2 | HNRNPUL1 |
| Q9UBU3 | GHRL     |
| P62269 | RPS18    |
| Q96DX5 | ASB9     |
| O95834 | EML2     |
| Q9HBL0 | TNS1     |
| P46777 | RPL5     |
| P84098 | RPL19    |
| P51159 | RAB27A   |
| Q9Y6X5 | ENPP4    |
| P07942 | LAMB1    |
| Q8NFW8 | CMAS     |
| P42025 | ACTR1B   |
| Q9HCC0 | MCCC2    |
| Q9NZ08 | ERAP1    |
| P62314 | SNRPD1   |
| P62195 | PSMC5    |
| O60841 | EIF5B    |
| O60547 | GMDS     |
| P18621 | RPL17    |
| P27694 | RPA1     |
| P14854 | COX6B1   |
| Q8IW45 | CARKD    |
| P61313 | RPL15    |
| O14980 | XPO1     |
| O75306 | NDUFS2   |
| O94903 | PROSC    |
| P50570 | DNM2     |
| O43809 | NUDT21   |
| Q9BTV4 | TMEM43   |
| Q9H8Y8 | GORASP2  |

|        |            |
|--------|------------|
| P09661 | SNRPA1     |
| P12270 | Tpr;TPR    |
| Q1KMD3 | HNRNPUL2   |
| Q12888 | TP53BP1    |
| P43686 | PSMC4      |
| Q9H3R2 | MUC13      |
| Q13217 | DNAJC3     |
| P61457 | PCBD1      |
| Q02952 | AKAP12     |
| O75368 | SH3BGRL    |
| Q5VV89 | MGST3      |
| P43034 | PAFAH1B1   |
| Q14019 | COTL1      |
| Q96A72 | MAGOHB     |
| Q13618 | CUL3       |
| Q12797 | ASPH       |
| P38159 | RBMX       |
| Q16775 | HAGH       |
| Q00796 | SORD       |
| Q12874 | SF3A3      |
| O00116 | AGPS       |
| P01034 | CST3       |
| P24666 | ACP1       |
| Q9BZZ5 | API5       |
| Q99733 | NAP1L4     |
| P05165 | PCCA       |
| P27708 | CAD        |
| Q92522 | H1FX       |
| P24539 | ATP5F1     |
| K7ER90 | EIF3G      |
| Q96DC8 | ECHDC3     |
| P55884 | EIF3B      |
| P06865 | HEXA       |
| P22102 | GART       |
| Q8TB96 | ITFG1      |
| Q01105 | SET;SETSIP |
| Q9Y5P6 | GMPPB      |
| P31949 | S100A11    |
| Q9NPJ3 | ACOT13     |
| P33908 | MAN1A1     |
| P16070 | CD44       |
| P04632 | CAPNS1     |
| Q86XR7 | TMED7      |
| A6NMZ7 | ERLIN2     |
| P09543 | CNP        |
| Q8IV08 | PLD3       |
| Q07021 | C1QBP      |
| O00232 | PSMD12     |
| O95716 | RAB3D      |
| O95861 | BPNT1      |

|        |          |
|--------|----------|
| P13693 | TPT1     |
| O95571 | ETHE1    |
| Q9UKY7 | CDV3     |
| Q9BS40 | LXN      |
| P17931 | LGALS3   |
| P29992 | GNA11    |
| Q9H0B6 | KLC2     |
| P01023 | A2M      |
| P42330 | AKR1C3   |
| Q13740 | ALCAM    |
| P08574 | CYC1     |
| Q15904 | ATP6AP1  |
| P02749 | APOH     |
| P19021 | PAM      |
| Q13526 | PIN1     |
| P26440 | IVD      |
| Q8NE71 | ABCF1    |
| P15289 | ARSA     |
| O60936 | NOL3     |
| P09471 | GNAO1    |
| P63173 | RPL38    |
| P33121 | ACSL1    |
| P14927 | UQCRB    |
| Q9H553 | ALG2     |
| Q14195 | DPYSL3   |
| Q9Y617 | PSAT1    |
| P51970 | NDUFA8   |
| Q13405 | MRPL49   |
| P35914 | HMGCL    |
| Q9UL25 | RAB21    |
| Q9HB07 | C12orf10 |
| O60832 | DKC1     |
| Q92896 | GLG1     |
| Q5T8U5 | SURF4    |
| Q9Y6B6 | SAR1B    |
| Q8WU90 | ZC3H15   |
| O60313 | OPA1     |
| O15371 | EIF3D    |
| P15121 | AKR1B1   |
| P23634 | ATP2B4   |
| Q04760 | GLO1     |
| Q13885 | TUBB2A   |
| Q9UNZ2 | NSFL1C   |
| P45954 | ACADSB   |
| Q9UL46 | PSME2    |
| P49773 | HINT1    |
| P61224 | RAP1B    |
| Q9UBQ5 | EIF3K    |
| Q16181 | 42622    |
| P55010 | EIF5     |

|        |          |
|--------|----------|
| Q9BSH5 | HDHD3    |
| O75976 | CPD      |
| Q7Z2W4 | ZC3HAV1  |
| Q92900 | UPF1     |
| P08621 | SNRNP70  |
| Q9ULA0 | DNPEP    |
| P61221 | ABCE1    |
| Q9Y285 | FARSA    |
| P35080 | PFN2     |
| Q6IAA8 | LAMTOR1  |
| Q9H444 | CHMP4B   |
| Q9UHG3 | PCYOX1   |
| Q15717 | ELAVL1   |
| Q15435 | PPP1R7   |
| Q96HY6 | DDRKG1   |
| Q16795 | NDUFA9   |
| Q13363 | CTBP1    |
| Q86Y39 | NDUFA11  |
| Q16270 | IGFBP7   |
| P25787 | PSMA2    |
| P61026 | RAB10    |
| Q13435 | SF3B2    |
| Q9Y512 | SAMM50   |
| P10768 | ESD      |
| O60784 | TOM1     |
| Q13451 | FKBP5    |
| Q969V3 | NCLN     |
| Q9NXG2 | THUMPD1  |
| P25788 | PSMA3    |
| O60613 | 42624    |
| Q3YEC7 | RABL6    |
| P08240 | SRPR     |
| Q9HC35 | EML4     |
| Q13867 | BLMH     |
| P25325 | MPST     |
| Q15043 | SLC39A14 |
| Q969X5 | ERGIC1   |
| Q15102 | PAFAH1B3 |
| P62263 | RPS14    |
| Q9Y5K8 | ATP6V1D  |
| O15212 | PFDN6    |
| Q5T5C0 | STXBP5   |
| Q7L5N1 | COPS6    |
| Q05639 | EEF1A2   |
| Q9NSE4 | IARS2    |
| Q09028 | RBBP4    |
| Q9UJU6 | DBNL     |
| Q6P587 | FAHD1    |
| Q92538 | GBF1     |
| P62861 | FAU      |

|        |          |
|--------|----------|
| Q5T123 | SH3BGRL3 |
| Q14651 | PLS1     |
| Q9BY50 | SEC11L3  |
| Q96C86 | DCPS     |
| Q9Y6D6 | ARFGF1   |
| P35659 | DEK      |
| Q15746 | MYLK     |
| Q16629 | SRSF7    |
| P61009 | SPCS3    |
| Q9NUQ9 | FAM49B   |
| Q15005 | SPCS2    |
| Q9NVS9 | PNPO     |
| Q9Y5U9 | IER3IP1  |
| P57737 | CORO7    |
| Q9UHQ9 | CYB5R1   |
| Q9Y2X3 | NOP58    |
| Q9Y2J2 | EPB41L3  |
| Q53FA7 | TP53I3   |
| P54727 | RAD23B   |
| O00217 | NDUFS8   |
| Q9NZB2 | FAM120A  |
| Q9Y365 | STARD10  |
| Q96PK6 | RBM14    |
| P36269 | GGT5     |
| Q8TB36 | GDAP1    |
| P78347 | GTF2I    |
| Q14108 | SCARB2   |
| Q9UNF0 | PACSIN2  |
| P46976 | GYG1     |
| O15355 | PPM1G    |
| Q9UJZ1 | STOML2   |
| Q96HC4 | PDLIM5   |
| P02753 | RBP4     |
| Q9HCN8 | SDF2L1   |
| Q9H9B4 | SFXN1    |
| P26196 | DDX6     |
| P47972 | NPTX2    |
| Q9Y5B9 | SUPT16H  |
| Q96AB3 | ISOC2    |
| Q7L576 | CYFIP1   |
| Q99805 | TM9SF2   |
| P55769 | NHP2L1   |
| O60888 | CUTA     |
| Q13283 | G3BP1    |
| P46109 | CRKL     |
| P63000 | RAC1     |
| O75822 | EIF3J    |
| Q6NVY1 | HIBCH    |
| Q9Y6E0 | STK24    |
| P62244 | RPS15A   |

|        |          |
|--------|----------|
| Q9UQ35 | SRRM2    |
| Q8NBX0 | SCCPDH   |
| P59768 | GNG2     |
| Q9P035 | PTPLAD1  |
| Q9Y4P3 | TBL2     |
| Q8NC51 | SERBP1   |
| Q5SSJ5 | HP1BP3   |
| Q9H4M9 | EHD1     |
| Q9H0E2 | TOLLIP   |
| P62318 | SNRPD3   |
| P07919 | UQCRH    |
| Q9Y6G9 | DYNC1LI1 |
| Q13442 | PDAP1    |
| P12955 | PEPD     |
| O14828 | SCAMP3   |
| Q9NQP4 | PFDN4    |
| O75436 | VPS26A   |
| Q9Y6H1 | CHCHD2   |
| Q9Y2T2 | AP3M1    |
| P13987 | CD59     |
| P50150 | GNG4     |
| Q5JS74 | CASK     |
| Q9UKV3 | ACIN1    |
| Q9NZ45 | CISD1    |
| Q9UBW8 | COPS7A   |
| Q08AM6 | VAC14    |
| Q9BRA2 | TXNDC17  |
| P54578 | USP14    |
| O00273 | DFFA     |
| O75323 | GBAS     |
| P25786 | PSMA1    |
| P51452 | DUSP3    |
| P84090 | ERH      |
| Q92552 | MRPS27   |
| Q13822 | ENPP2    |
| O95197 | RTN3     |
| Q9NPA0 | EMC7     |
| O75521 | ECI2     |
| P61916 | NPC2     |
| Q8NBF2 | NHLRC2   |
| Q9Y3C8 | UFC1     |
| O14745 | SLC9A3R1 |
| Q96RP9 | GFM1     |
| P22307 | SCP2     |
| Q9BR76 | CORO1B   |
| O95292 | VAPB     |
| P28066 | PSMA5    |
| P12004 | PCNA     |
| Q99962 | SH3GL2   |
| P10636 | MAPT     |

|         |          |
|---------|----------|
| P17096  | HMGA1    |
| P41567  | EIF1     |
| P29218  | IMPA1    |
| Q96IJ6  | GMPPA    |
| P51808  | DYNLT3   |
| P35555  | FBN1     |
| P06756  | ITGAV    |
| Q8TCJ2  | STT3B    |
| Q15233  | NONO     |
| Q96RQ3  | MCCC1    |
| Q2TAY7  | SMU1     |
| Q96FJ2  | DYNLL2   |
| O95573  | ACSL3    |
| O43813  | LANCL1   |
| Q15020  | SART3    |
| Q02880  | TOP2B    |
| P18085  | ARF4     |
| P20674  | COX5A    |
| Q9BY67- | CADM1    |
| Q9NVH1  | DNAJC11  |
| P23141  | CES1     |
| P61586  | RHOA     |
| Q9Y2Z0  | SUGT1    |
| P31689  | DNAJA1   |
| Q14683  | SMC1A    |
| P27635  | RPL10    |
| Q6UXG2  | KIAA1324 |
| Q9ULC4  | MCTS1    |
| P04054  | PLA2G1B  |
| Q04446  | GBE1     |
| Q00688  | FKBP3    |
| Q14696  | MESDC2   |
| P49915  | GMPS     |
| O15143  | ARPC1B   |
| P14543  | NID1     |
| P63096  | GNAI1    |
| P30626  | SRI      |
| Q13596  | SNX1     |
| O75832  | PSMD10   |
| P62995  | TRA2B    |
| Q96C19  | EFHD2    |
| P61201  | COPS2    |
| P53004  | BLVRA    |
| Q9NUQ7  | UFSP2    |
| Q13232  | NME3     |
| Q9UI30  | TRMT112  |
| Q14749  | GNMT     |
| P55795  | HNRNPH2  |
| Q13554  | CAMK2B   |
| O95394  | PGM3     |



|        |           |
|--------|-----------|
| P14324 | FDPS      |
| Q9NY12 | GAR1      |
| O43852 | CALU      |
| P15309 | ACPP      |
| O15320 | CTAGE5    |
| P63208 | SKP1      |
| P37235 | HPCAL1    |
| P02786 | TFRC      |
| Q02790 | FKBP4     |
| P11279 | LAMP1     |
| P19623 | SRM       |
| Q6PI48 | DARS2     |
| Q9Y2H6 | FNDC3A    |
| Q9Y3B4 | SF3B6     |
| Q8NDC0 | MAPK1IP1L |
| Q86X76 | NIT1      |
| P22760 | AADAC     |
| P48059 | LIMS1     |
| P30043 | BLVRB     |
| Q8N335 | GPD1L     |
| Q9UMS0 | NFU1      |
| Q13247 | SRSF6     |
| P56385 | ATP5I     |
| Q6IBS0 | TWF2      |
| O75844 | ZMPSTE24  |
| Q9HOR4 | HDHD2     |
| Q9Y3E1 | HDGFRP3   |
| Q9NZU5 | LMCD1     |
| Q6L8Q7 | PDE12     |
| P61254 | RPL26     |
| Q9UKG1 | APPL1     |
| Q9Y266 | NUDC      |
| Q9BWF3 | RBM4      |
| P0CG37 | CFC1      |
| P11387 | TOP1      |
| Q12792 | TWF1      |
| Q04837 | SSBP1     |
| Q13630 | TSTA3     |
| P50897 | PPT1      |
| O95994 | AGR2      |
| Q6PIU2 | NCEH1     |
| P20337 | RAB3B     |
| P13073 | COX4I1    |
| P46063 | RECQL     |
| Q32MZ4 | LRRFIP1   |
| Q96HN2 | AHCYL1    |
| P51572 | BCAP31    |
| P61278 | SST       |
| P11413 | G6PD      |
| P28072 | PSMB6     |

|        |          |
|--------|----------|
| Q9UBQ0 | VPS29    |
| Q9Y2S2 | CRYL1    |
| Q9H488 | POFUT1   |
| Q14118 | DAG1     |
| Q96A26 | FAM162A  |
| Q5SYV1 | SARDH    |
| P51665 | PSMD7    |
| P11137 | MAP2     |
| O75340 | PDCD6    |
| Q9H173 | SIL1     |
| Q96GX9 | APIP     |
| Q86V81 | ALYREF   |
| Q8N4T8 | CBR4     |
| Q01844 | EWSR1    |
| O95373 | IPO7     |
| Q96TA1 | FAM129B  |
| P30533 | LRPAP1   |
| P41250 | GARS     |
| Q92688 | ANP32B   |
| Q9H3P7 | ACBD3    |
| Q13144 | EIF2B5   |
| P08217 | CELA2A   |
| P48449 | LSS      |
| Q14444 | CAPRIN1  |
| P62917 | RPL8     |
| O95870 | ABHD16A  |
| O00442 | RTCA     |
| Q96DG6 | CMBL     |
| Q15369 | TCEB1    |
| Q01130 | SRSF2    |
| Q13409 | DYNC1I2  |
| P51531 | SMARCA4  |
| Q96HJ9 | LUC7L2   |
| P07305 | H1FO     |
| P04118 | CLPS     |
| P29590 | PML      |
| A0MZ66 | KIAA1598 |
| O00264 | PGRMC1   |
| Q7Z4W1 | DCXR     |
| Q8WXH0 | SYNE2    |
| Q96CW1 | AP2M1    |
| Q16853 | AOC3     |
| Q13148 | TARDBP   |
| P18077 | RPL35A   |
| P05198 | EIF2S1   |
| Q9UN86 | G3BP2    |
| P56470 | LGALS4   |
| Q9NX63 | CHCHD3   |
| Q9P016 | THYN1    |
| P16401 | HIST1H1B |

|        |         |
|--------|---------|
| P60953 | CDC42   |
| P30419 | NMT1    |
| Q2TAA2 | IAH1    |
| Q9GZT3 | SLIRP   |
| Q92747 | ARPC1A  |
| O43684 | BUB3    |
| Q14847 | LASP1   |
| Q13547 | HDAC1   |
| P63220 | RPS21   |
| Q13642 | FHL1    |
| P30049 | ATP5D   |
| O43854 | EDIL3   |
| Q9BRP8 | WIBG    |
| Q9H3N1 | TMX1    |
| Q13045 | FLII    |
| Q9BXP5 | SRRT    |
| Q9Y653 | GPR56   |
| Q9UFM8 | NPTN    |
| P16219 | ACADS   |
| O00487 | PSMD14  |
| P61513 | RPL37A  |
| P80723 | BASP1   |
| O75534 | CSDE1   |
| P49756 | RBM25   |
| P15088 | CPA3    |
| Q9NP81 | SARS2   |
| Q9UBV2 | SEL1L   |
| O75355 | ENTPD3  |
| Q8N183 | NDUFAF2 |
| Q7Z4S6 | KIF21A  |
| P40222 | TXLNA   |
| O43676 | NDUFB3  |
| P67809 | YBX1    |
| Q13509 | TUBB3   |
| P62942 | FKBP1A  |
| P15090 | FABP4   |
| Q9Y2W1 | THRAP3  |
| Q14061 | COX17   |
| Q9UNE2 | RPH3AL  |
| P53990 | IST1    |
| Q8NBU5 | ATAD1   |
| Q9NV96 | TMEM30A |
| Q92597 | NDRG1   |
| P23946 | CMA1    |
| P60468 | SEC61B  |
| P61619 | SEC61A1 |
| Q96E17 | RAB3C   |
| P06703 | S100A6  |
| P15531 | NME1    |
| Q9UBE0 | SAE1    |

**ap proteins** Overlap for all the identified proteins between LCM and EIC islets

| es | Uniprot ID |
|----|------------|
|    | H7BZJ3     |
|    | O00151     |
|    | O00159     |
| I  | O00231     |
| :  | O00299     |
|    | O00483     |
|    | O00487     |
|    | O00571     |
|    | O14732     |
|    | O14773     |
|    | O14979     |
|    | O14980     |
|    | O15144     |
|    | O15145     |
|    | O15173     |
|    | O15230     |
|    | O15305     |
|    | O15511     |
|    | O43143     |
|    | O43242     |
|    | O43324     |
|    | O43390     |
|    | O43396     |
|    | O43488     |
|    | O43583     |
|    | O43681     |
|    | O43707     |
|    | O43776     |
|    | O43795     |
|    | O60361     |
|    | O60506     |
|    | O60701     |
|    | O60716     |
|    | O60763     |
|    | O60825     |
|    | O60831     |
|    | O60888     |
|    | O75083     |
|    | O75131     |
|    | O75323     |
|    | O75340     |
|    | O75347     |
|    | O75348     |
|    | O75367     |
|    | O75368     |
|    | O75369     |
|    | O75380     |
|    | O75390     |

O75396  
O75489  
O75531  
O75822  
O75874  
O75915  
O75947  
O75947  
O75964  
O76038  
O94760  
O94826  
O94875  
O94875  
O94979  
O95197  
O95292  
O95336  
O95340  
O95394  
O95716  
O95777  
O95831  
O95834  
O95994  
P00167  
P00325  
P00338  
P00352  
P00367  
P00387  
P00390  
P00403  
P00441  
P00450  
P00492  
P00505  
P00558  
P00568  
P00751  
P00918  
P00995  
P01009  
P01011  
P01023  
P01024  
P01033  
P01034  
P01275  
P01308

P01834  
P02545  
P02647  
P02753  
P02766  
P02774  
P02787  
P02792  
P02794  
P04054  
P04066  
P04075  
P04080  
P04083  
P04114  
P04118  
P04179  
P04406  
P04746  
P04792  
P04843  
P04844  
P04899  
P04908  
P05023  
P05026  
P05060  
P05091  
P05141  
P05198  
P05204  
P05386  
P05387  
P05388  
P05408  
P05408  
P05408  
P05408  
P05451  
P05455  
P05556  
P05783  
P06396  
P06396  
P06454  
P06576  
P06703  
P06733  
P06744  
P06748

P06753  
P07099  
P07108  
P07195  
P07237  
P07305  
P07339  
P07355  
P07384  
P07478  
P07602  
P07686  
P07737  
P07741  
P07814  
P07858  
P07900  
P07910  
P07919  
P07942  
P07954  
P08107  
P08123  
P08133  
P08133  
P08195  
P08217  
P08237  
P08238  
P08247  
P08294  
P08559  
P08574  
P08670  
P08727  
P08758  
P08861  
P08865  
P08962  
P09093  
P09104  
P09210  
P09211  
P09382  
P09417  
P09429  
P09455  
P09471  
P09496  
P09497

P09525  
P09543  
P09622  
P09651  
P09669  
P09874  
P09936  
P09960  
P09972  
POC055  
POCG37  
POCW22  
P10253  
P10412  
P10515  
P10599  
P10606  
P10645  
P10768  
P10809  
P10909  
P11021  
P11047  
P11137  
P11142  
P11177  
P11279  
P11310  
P11766  
P11940  
P12109  
P12110  
P12111  
P12235  
P12236  
P12268  
P12270  
P12277  
P12532  
P12814  
P12955  
P12956  
P13010  
P13073  
P13473  
P13489  
P13521  
P13639  
P13667  
P13693



P13798  
P13804  
P13987  
P14174  
P14209  
P14314  
P14406  
P14543  
P14550  
P14618  
P14618  
P14625  
P14866  
P14868  
P14923  
P14927  
P15085  
P15086  
P15121  
P15311  
P15531  
P15880  
P15924  
P16152  
P16233  
P16401  
P16403  
P16422  
P16435  
P16519  
P16615  
P16870  
P16949  
P17066  
P17174  
P17844  
P17858  
P17980  
P17987  
P18077  
P18085  
P18124  
P18206  
P18564  
P18621  
P18669  
P18859  
P19021  
P19105  
P19338

P19404  
P19835  
P20073  
P20231  
P20336  
P20337  
P20340  
P20618  
P20674  
P20700  
P20962  
P21266  
P21281  
P21291  
P21333  
P21397  
P21399  
P21695  
P21796  
P21810  
P21980  
P22061  
P22087  
P22234  
P22307  
P22314  
P22626  
P22695  
P23246  
P23284  
P23368  
P23396  
P23526  
P23528  
P23588  
P23634  
P24043  
P24534  
P24539  
P24666  
P24752  
P25398  
P25705  
P25786  
P25788  
P25789  
P26038  
P26368  
P26373  
P26440

P26599  
P26639  
P26640  
P26641  
P26885  
P27348  
P27635  
P27695  
P27797  
P27816  
P27824  
P28066  
P28070  
P28072  
P28074  
P28161  
P28331  
P28482  
P29120  
P29218  
P29401  
P29692  
P29966  
P30040  
P30041  
P30042  
P30044  
P30046  
P30048  
P30049  
P30050  
P30084  
P30085  
P30086  
P30101  
P30153  
P30626  
P30740  
P31150  
P31930  
P31937  
P31942  
P31946  
P31946  
P31948  
P31949  
P32119  
P32969  
P33176  
P33908

P34932  
P35080  
P35221  
P35232  
P35237  
P35268  
P35579  
P35580  
P35606  
P35998  
P36542  
P36543  
P36578  
P36871  
P36969  
P37108  
P37198  
P37802  
P37837  
P38117  
P38159  
P38606  
P38646  
P38919  
P39019  
P39023  
P39656  
P39687  
P40227  
P40313  
P40429  
P40616  
P40925  
P40926  
P40939  
P41091  
P42126  
P42677  
P42704  
P42765  
P42766  
P43304  
P43487  
P43686  
P45880  
P45974  
P46459  
P46777  
P46778  
P46779

P46781  
P46782  
P46783  
P46821  
P46940  
P46976  
P46977  
P47755  
P47756  
P47914  
P47985  
P48047  
P48052  
P48059  
P48304  
P48444  
P48556  
P48637  
P48643  
P48735  
P49189  
P49207  
P49257  
P49327  
P49368  
P49411  
P49458  
P49588  
P49591  
P49720  
P49721  
P49748  
P49755  
P49773  
P49821  
P50148  
P50150  
P50213  
P50395  
P50440

-INRNPA1L2 P50454

P50502  
P50570  
P50895  
P50914  
P50990  
P50991  
P50995  
P51148  
P51149

P51159  
P51571  
P51572  
P51608  
P51659  
P51858  
P51991  
P51991  
P52209  
P52272  
P52565  
P52597  
P53007  
P53396  
P53597  
P53618  
P53621  
P53680  
P53999  
P54136  
P54317  
P54577  
P54710  
P54727  
P54819  
P54886  
P54920  
P55072  
P55084  
P55145  
P55209  
P55259  
P55259  
P55327  
P55735  
P55769  
P55786  
P55795  
P55884  
P56134  
P56192  
P56385  
P57088  
P59768  
P59998  
P60059  
P60174  
P60228  
P60468  
P60660

P60866  
P60891  
P60900  
P60903  
P60953  
P60981  
P61009  
P61019  
P61026  
P61081  
P61088  
P61106  
P61158  
P61160  
P61163  
P61221  
P61224  
P61247  
P61254  
P61278  
P61313  
P61353  
P61421  
P61457  
P61586  
P61604  
P61619  
P61764  
P61769  
P61803  
P61916  
P61923  
P61956  
P61970  
P61978  
P61978  
P61981  
P62081  
P62140  
P62158  
P62195  
P62241  
P62244  
P62249  
P62258  
P62263  
P62266  
P62269  
P62277  
P62280

P62304  
P62314  
P62316  
P62328  
P62424  
P62491  
P62701  
P62750  
P62753  
P62805  
P62807  
P62820  
P62826  
P62829  
P62837  
P62847  
P62851  
P62854  
P62857  
P62873  
P62879  
P62888  
P62899  
P62906  
P62913  
P62917  
P62937  
P62942  
P62979  
P62995  
P63000  
P63010  
P63027  
P63092  
P63104  
P63167  
P63208  
P63220  
P63241  
P63244  
P63261  
P63313  
P67936  
P68366  
P68371  
P68871  
P69905  
P78371  
P78527  
P80404



P82970  
P82979  
P83731  
P83881  
P83916  
P84077  
P84090  
P84098  
P84103  
P84157  
P84243  
P98160  
Q00325  
Q00341  
Q00577  
Q00610  
Q00765  
Q00796  
Q00839  
Q01082  
Q01105  
Q01130  
Q01433  
Q01469  
Q01518  
Q01844  
Q01995  
Q02252  
Q02543  
Q02878  
Q02978  
Q03135  
Q03252  
Q04637  
Q04760  
Q04837  
Q04917  
Q04941  
Q05329  
Q05639  
Q05682  
Q05BK6  
Q06323  
Q06830  
Q07020  
Q07021  
Q07065  
Q07666  
Q07955  
Q07960

Q08211  
Q08257  
Q08380  
Q08554  
Q08945  
Q09028  
Q09666  
Q12765  
Q12904  
Q12905  
Q12906  
Q12907  
Q13011  
Q13087  
Q13148  
Q13151  
Q13162  
Q13200  
Q13217  
Q13232  
Q13247  
Q13263  
Q13347  
Q13363  
Q13404  
Q13409  
Q13423  
Q13451  
Q13510  
Q13557  
Q13561  
Q13596  
Q13630  
Q13724  
Q13740  
Q13765  
Q13813  
Q13813  
Q13838  
Q13867  
Q13885  
Q14011  
Q14019  
Q14061  
Q14103  
Q14108  
Q14152  
Q14165  
Q14194  
Q14204

Q14240  
Q14444  
Q14697  
Q14847  
Q14914  
Q14974  
Q15019  
Q15046  
Q15056  
Q15084  
Q15149  
Q15181  
Q15185  
Q15233  
Q15293  
Q15363  
Q15365  
Q15366  
Q15370  
Q15437  
Q15631  
Q15691  
Q15717  
Q15843  
Q16181  
Q16270  
Q16531  
Q16555  
Q16629  
Q16698  
Q16769  
Q16795  
Q16799  
Q16836  
Q16849  
Q16851  
Q16853  
Q16864  
Q16891  
Q3SY69  
Q52LJ0  
Q53EL6  
Q53GQ0  
Q58FF6  
Q5H8X8  
Q5JPE7  
Q5SSJ5  
Q5SZU1  
Q5T123  
Q5T8U5

Q5TEC6  
Q5TZA2  
Q5VWZ2  
Q63HM9  
Q6NUK1  
Q6NVY1  
Q6NZI2  
Q6P996  
Q6PCB0  
Q6PUV4  
Q6UXG2  
Q6WKZ4  
Q71UM5  
Q7KZF4  
Q7L2H7  
Q7Z406  
Q7Z4W1  
Q86SK9  
Q86UP2  
Q86UY0  
Q86V81  
Q86VP6  
Q86XR7  
Q86Y82  
Q86YB8  
Q8IV08  
Q8IYT4  
Q8N398  
Q8NBQ5  
Q8NC51  
Q8NCW5  
Q8NFU3  
Q8NI22  
Q8TC12  
Q8TC26  
Q8TCT9  
Q8WUM4  
Q8WVM8  
Q8WW12  
Q8WXD2  
Q92499  
Q92504  
Q92522  
Q92688  
Q92747  
Q92804  
Q92841  
Q92896  
Q92945  
Q93050

Q93084  
Q969E4  
Q969H8  
Q969V3  
Q96A72  
Q96AE4  
Q96AG4  
Q96CW1  
Q96CX2  
Q96DG6  
Q96DN0  
Q96E17  
Q96FW1  
Q96HN2  
Q96I99  
Q96IJ6  
Q96IU4  
Q96KP4  
Q96PK6  
Q96QK1  
Q96RQ3  
Q99436  
Q99497  
Q99536  
Q99613  
Q99623  
Q99714  
Q99729  
Q99798  
Q99832  
Q99895  
Q99962  
Q9BQB6  
Q9BR76  
Q9BRA2  
Q9BRX8  
Q9BS26  
Q9BSJ8  
Q9BTT0  
Q9BVC6  
Q9BVK6  
Q9BW30  
Q9BX97  
Q9H0U4  
Q9H1E3  
Q9H205  
Q9H223  
Q9H2U2  
Q9H3N1  
Q9H3Z4

Q9H4A4  
Q9H8H3  
Q9H9B4  
Q9HC35  
Q9HC38  
Q9HCJ6  
Q9HCN8  
Q9HDC9  
Q9NP97  
Q9NPJ3  
Q9NQC3  
Q9NQC3  
Q9NR28  
Q9NR45  
Q9NRV9  
Q9NS69  
Q9NSD9  
Q9NTK5  
Q9NUJ1  
Q9NUQ9  
Q9NVA2  
Q9NVJ2  
Q9NX63  
Q9NYL4  
Q9NZ01  
Q9NZ45  
Q9NZB2  
Q9P035  
Q9P0L0  
Q9P0M6  
Q9P2E9  
Q9P2R7  
Q9UBI6  
Q9UBQ7  
Q9UBR2  
Q9UBU3  
Q9UHB9  
Q9UHG2  
Q9UHG3  
Q9UHL4  
Q9UHQ9  
Q9UHY7  
Q9UI12  
Q9UI15  
Q9UIJ7  
Q9UJS0  
Q9UL25  
Q9UL46  
Q9ULA0  
Q9ULD0

Q9ULU8  
Q9UMX0  
Q9UMX5  
Q9UNE2  
Q9UNS2  
Q9UPY8  
Q9UQ80  
Q9Y224  
Q9Y262  
Q9Y265  
Q9Y266  
Q9Y277  
Q9Y277  
Q9Y285  
Q9Y2B0  
Q9Y2J2  
Q9Y2Q0  
Q9Y2R0  
Q9Y2T3  
Q9Y2Z0  
Q9Y3A6  
Q9Y3E1  
Q9Y3I0  
Q9Y490  
Q9Y4L1  
Q9Y4P3  
Q9Y5P6  
Q9Y5S9  
Q9Y617  
Q9Y646  
Q9Y678  
Q9Y696  
Q9Y6B6  
Q9Y6C9  
Q9Y6N5
